# Supplementary material for: Visible light-induced aerobic oxidative cross-coupling of glycine esters with α-angelicalactone: a facile pathway to γ-lactams
Source: Royal Society of Chemistry journal article supplement (doi:10.1039/c8ob01844h), 2018-01-01

## Electronic Supplementary Information

### Visible light-induced aerobic oxidative cross-coupling of glycine esters with $\alpha$ -angelicalactone: a facile pathway to $\gamma$ -lactams

Huang Zhou, Xiaorong Yang, Shilin Li, Yin Zhu, Ying Li\* and Yuan Zhang\*

State Key Laboratory of Applied Organic Chemistry, College of Chemistry and Chemical Engineering, Lanzhou University, 222 Tianshui South Road, Lanzhou 730000, P. R. China. E-mail: zhangyuan@lzu.edu.cn.

#### Table of Contents

1. Optimization of Reaction Conditions (S2)
2. Luminescence Quenching Experiments (S5)
3. Experimental (S5)
4. Copies of  $^1\text{H}$  and  $^{13}\text{C}$  NMR Spectra (S7)

## 1. Optimization of Reaction Conditions

**Table S1.** Screening of Photocatalysts<sup>a</sup>

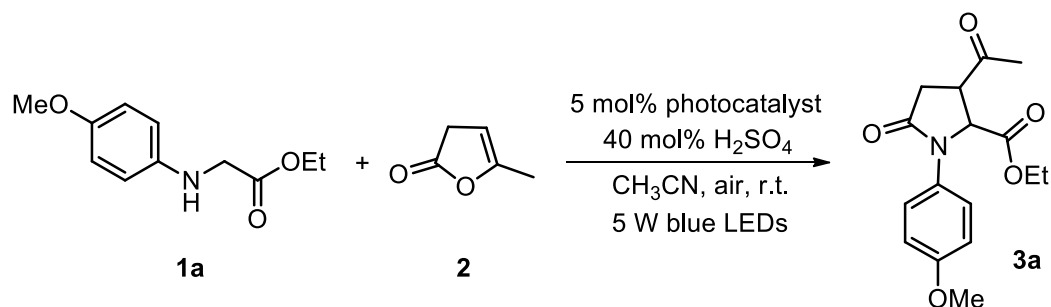

| entry          | photocatalyst                                            | yield (%) <sup>e</sup> |
|----------------|----------------------------------------------------------|------------------------|
| 1              | Ru(bpy) <sub>3</sub> Cl <sub>2</sub> · 6H <sub>2</sub> O | 33                     |
| 2              | Eosin Y                                                  | 29                     |
| 3              | Rose Bengal                                              | 41                     |
| 4              | Rhodamine 6G                                             | 54                     |
| 5 <sup>b</sup> | Rhodamine 6G                                             | 48                     |
| 6 <sup>c</sup> | Rhodamine 6G                                             | 42                     |
| 7 <sup>d</sup> | Rhodamine 6G                                             | 32                     |
| 8              | Eosin B                                                  | 37                     |
| 9              | Methylene Blue                                           | 48                     |
| 10             | 9-Mesityl-10-methylacridinium perchlorate                | 32                     |

<sup>a</sup>Reaction conditions: **1a** (0.1 mmol), **2** (0.2 mmol), CH<sub>3</sub>CN (2 mL), H<sub>2</sub>SO<sub>4</sub> (10 M, 40 mol%), photocatalyst (5 mol%), 5 W blue LED light irradiation in air at room temperature for 12 h. <sup>b</sup>2.5 mol% of Rhodamine 6G was used. <sup>c</sup>10 mol% of Rhodamine 6G was used. <sup>d</sup>20 mol% of Rhodamine 6G was used. <sup>e</sup>Isolated yields.

**Table S2.** Screening of Acids<sup>a</sup>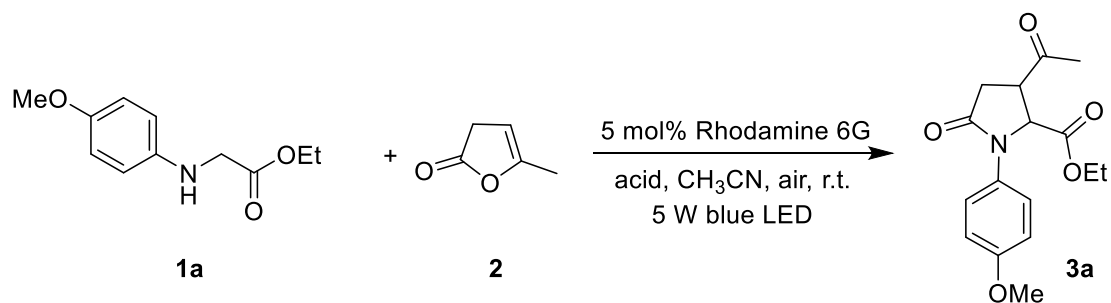

| entry               | acid                                            | time (h) | yield (%) <sup>j</sup> |
|---------------------|-------------------------------------------------|----------|------------------------|
| 1                   | HCl                                             | 15       | 23                     |
| 2                   | AcOH                                            | 15       | NR                     |
| 3                   | H <sub>3</sub> PO <sub>4</sub>                  | 15       | NR                     |
| 4                   | TsOH H <sub>2</sub> O                           | 12       | trace                  |
| 5                   | TfOH                                            | 12       | 17                     |
| 6                   | TFA                                             | 12       | 29                     |
| 7 <sup>b</sup>      | H <sub>2</sub> SO <sub>4</sub> (10 M)           | 12       | 27                     |
| 8 <sup>c</sup>      | H <sub>2</sub> SO <sub>4</sub> (10 M)           | 12       | 54                     |
| 9 <sup>c</sup>      | H <sub>2</sub> SO <sub>4</sub> (10 M)           | 6        | 46                     |
| 10 <sup>d</sup>     | H <sub>2</sub> SO <sub>4</sub> (10 M)           | 12       | ND                     |
| 11 <sup>c,e</sup>   | H <sub>2</sub> SO <sub>4</sub> (10 M)           | 12       | 62                     |
| 12 <sup>c,f</sup>   | H <sub>2</sub> SO <sub>4</sub> (10 M)           | 12       | 59                     |
| 13 <sup>c,g</sup>   | H <sub>2</sub> SO <sub>4</sub> (10 M)           | 24       | 43                     |
| 14 <sup>c,e,h</sup> | H <sub>2</sub> SO <sub>4</sub> (10 M)           | 12       | 34                     |
| 15 <sup>c,e</sup>   | conc. H <sub>2</sub> SO <sub>4</sub>            | 12       | 38                     |
| 16 <sup>c</sup>     | citric acid                                     | 12       | NR                     |
| 17                  | HClO <sub>4</sub>                               | 12       | NR                     |
| 18 <sup>c</sup>     | HNO <sub>3</sub>                                | 7        | 31                     |
| 19 <sup>i</sup>     | HBr                                             | 7        | 46                     |
| 20 <sup>c</sup>     | HI                                              | 12       | 56                     |
| 21                  | CH <sub>3</sub> SO <sub>3</sub> H               | 15       | 41                     |
| 22                  | C <sub>6</sub> H <sub>5</sub> SO <sub>3</sub> H | 15       | 36                     |

<sup>a</sup>Reaction conditions: **1a** (0.1 mmol), **2** (0.2 mmol), CH<sub>3</sub>CN (2 mL), acid (80 mol%), Rhodamine 6G (5 mol%), 5 W blue LED light irradiation in air at room temperature. <sup>b</sup>20 mol% of acid was used. <sup>c</sup>40 mol% of acid was used. <sup>d</sup>120 mol% of acid was used. <sup>e</sup>0.3 mmol **2** was used. <sup>f</sup>0.4 mmol **2** was used. <sup>g</sup>0.6 mmol **2** was used. <sup>h</sup>heated at 70 °C. <sup>i</sup>30 mol% of acid was used. <sup>j</sup>Isolated yields.

**Table S3.** Screening of the Solvent<sup>a</sup>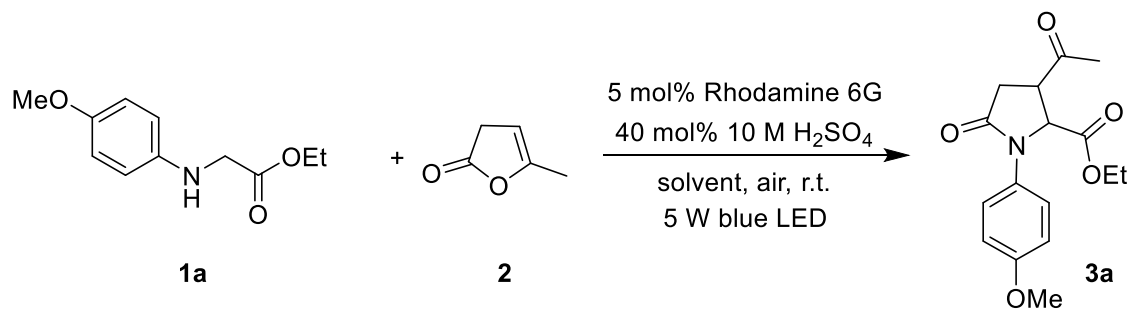

| entry | solvent             | yield (%) <sup>b</sup> |
|-------|---------------------|------------------------|
| 1     | ethanol             | trace                  |
| 2     | methanol            | trace                  |
| 3     | cyclohexane         | NR                     |
| 4     | DCE                 | NR                     |
| 5     | 1,4-dioxane         | NR                     |
| 6     | methylene chloride  | trace                  |
| 7     | chloroform          | trace                  |
| 8     | THF                 | trace                  |
| 9     | acetic acid         | 43                     |
| 10    | DMSO                | NR                     |
| 11    | DMF                 | NR                     |
| 12    | toluene             | trace                  |
| 13    | CH <sub>3</sub> CN  | 54                     |
| 14    | Cl <sub>3</sub> CCN | trace                  |
| 15    | EtOAc               | ND                     |
| 16    | 1-Methylpyrrolidine | ND                     |

<sup>a</sup>Reaction conditions: **1a** (0.1 mmol), **2** (0.2 mmol), solvent (2 mL), H<sub>2</sub>SO<sub>4</sub> (10 M, 40 mol%), Rhodamine 6G (5 mol%), 5 W blue LED light irradiation in air at room temperature for 12 h.

<sup>b</sup>Isolated yields.

## 2. Luminescence Quenching Experiments

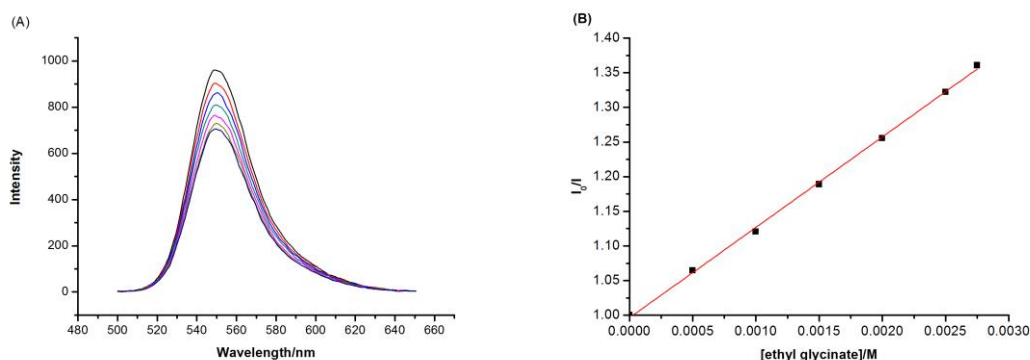

**Figure S1.** A) Changes in the fluorescence spectra of Rhodamine 6G ( $2.0 \times 10^{-6}$  M) upon the progressive addition of **1a** ( $5.0 \times 10^{-4}$  M) in CH<sub>3</sub>CN; B) Stern–Volmer quenching plot of Rhodamine 6G in the presence of **1a**.

## 3. Experimental

### General information

Unless otherwise noted, all reagents were purchased from commercial sources and used as received without further purification. N-arylglycine derivatives were prepared according to literature procedures<sup>1</sup>. Unless otherwise indicated, all experiments were carried out under air atmosphere. Irradiation of photochemical reactions was carried out using a 5 W blue LED bulb. The silica gel (200–300 meshes) was used for column chromatography and TLC inspections were taken on silica gel GF254 plates. Liquid <sup>1</sup>H and <sup>13</sup>C NMR spectra were recorded on a Bruker Avance III 400 MHz spectrometer. High resolution mass spectra (HRMS) were obtained on a mass spectrometer by using electrospray ionization (ESI) analyzed by quadrupole time-of-flight (QToF). Luminescence spectra were surveyed on a PerkinElmer LS 55 spectrophotometer.

### General procedure for the visible-light-induced photocatalytic aerobic oxidative dehydrogenative formal [2 + 3] cyclization of glycine esters with $\alpha$ -angelicalactone

To a solution of N-arylglycine esters **1** (0.1 mmol, 1 equiv), Rh-6G (5 mol %) in dry CH<sub>3</sub>CN (2.0 mL) was added H<sub>2</sub>SO<sub>4</sub> (40 mol %). Under the irradiation of a 5 W blue LED bulb,  $\alpha$ -angelicalactone **2** (0.3 mmol, 3 equiv) was added in three batches during 1 hour, then the mixture was stirred under the irradiation of blue LED at room temperature. After completion of the reaction as monitored by TLC, the solvent was concentrated in vacuo. The crude product was purified by flash chromatography on silica gel (with petroleum ether/acetone = 4:1 as eluent) to afford the products.

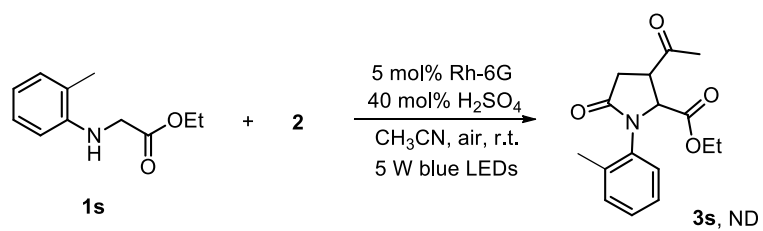

**Scheme S1.** Performance the reaction with ortho-substituted N-aryl glycine ester as substrate.

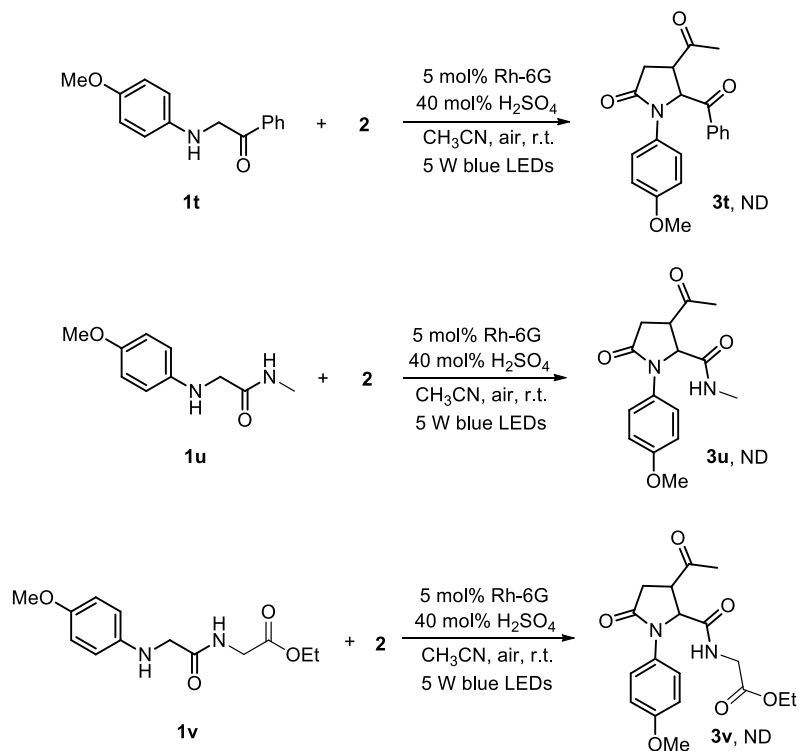

**Scheme S2.** Performance the reaction with other  $\alpha$ -amino carbonyls as substrate.

### References:

- [1] J. Xie and Z. Z. Huang, *Angew. Chem., Int. Ed.*, 2010, **49**, 10181-10185.

## 4. Copies of $^1\text{H}$ and $^{13}\text{C}$ Spectra

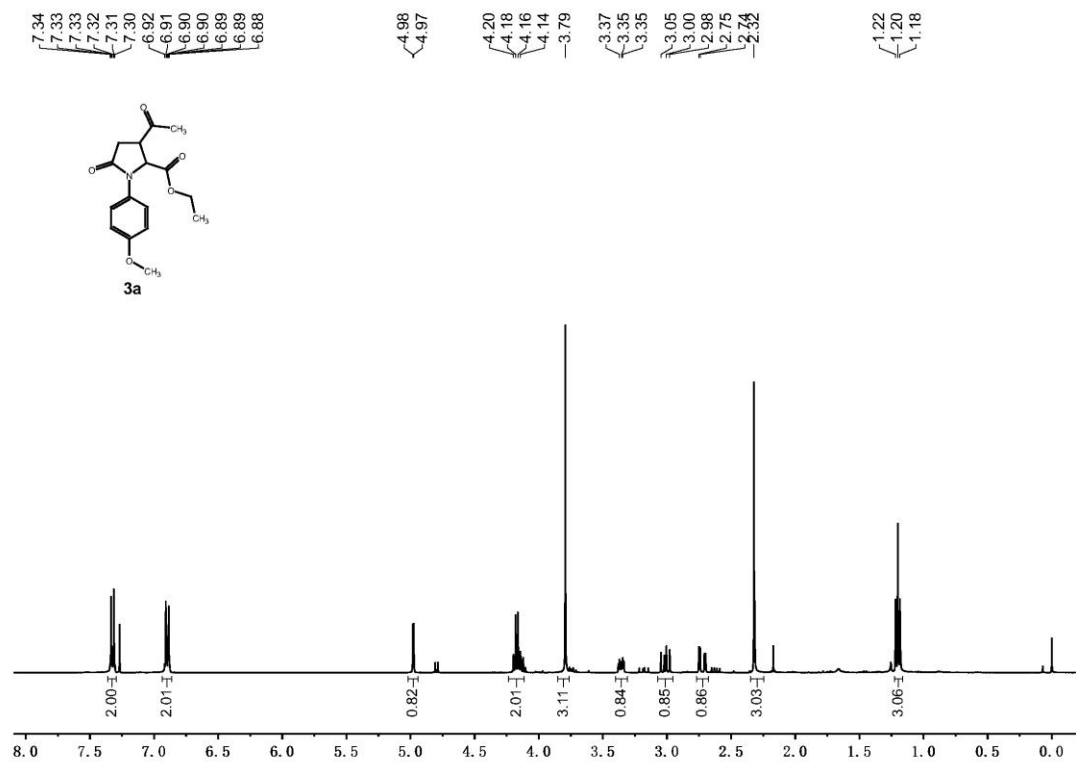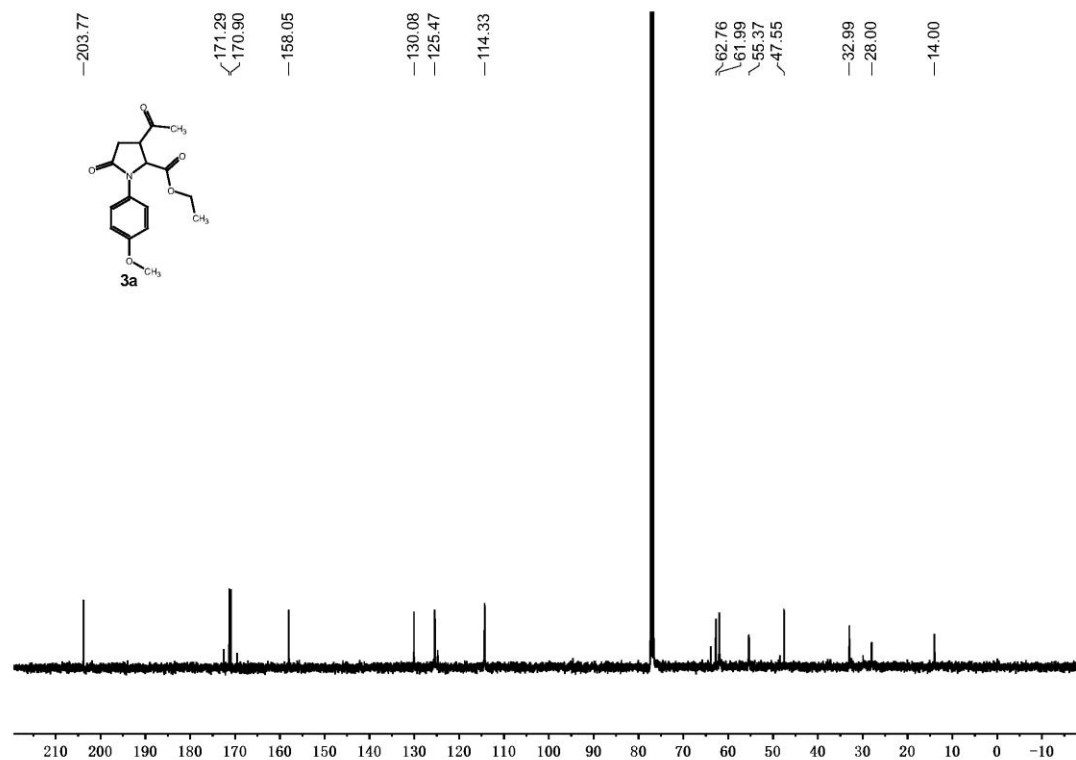

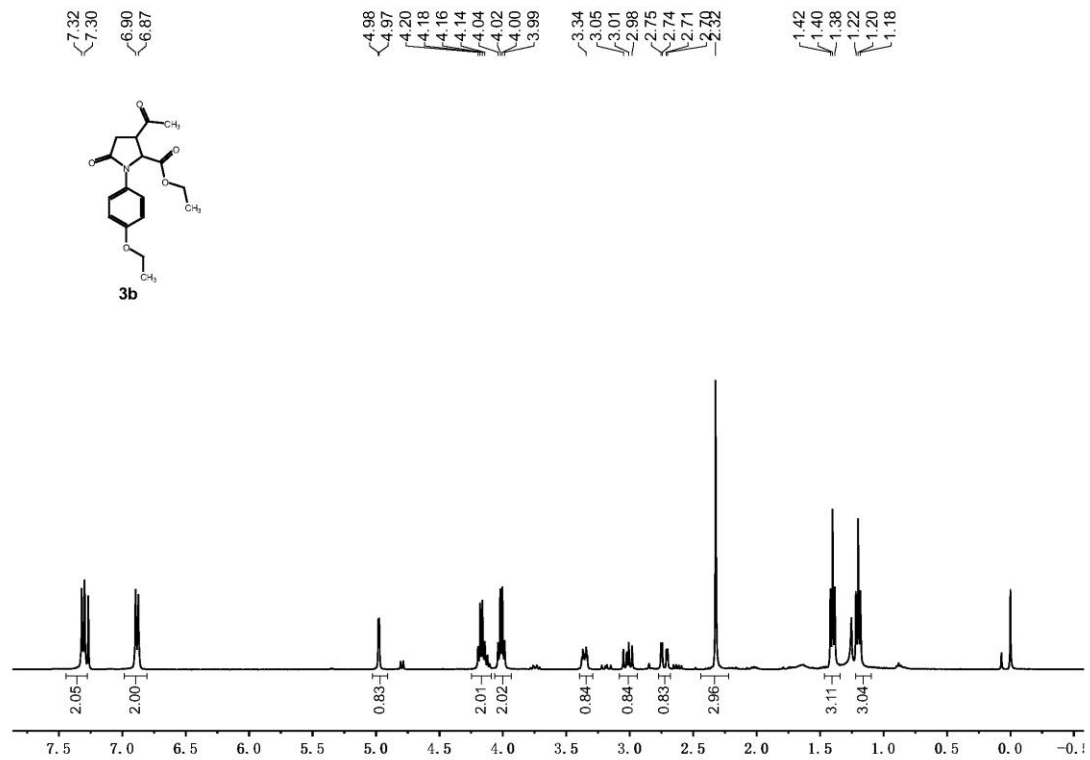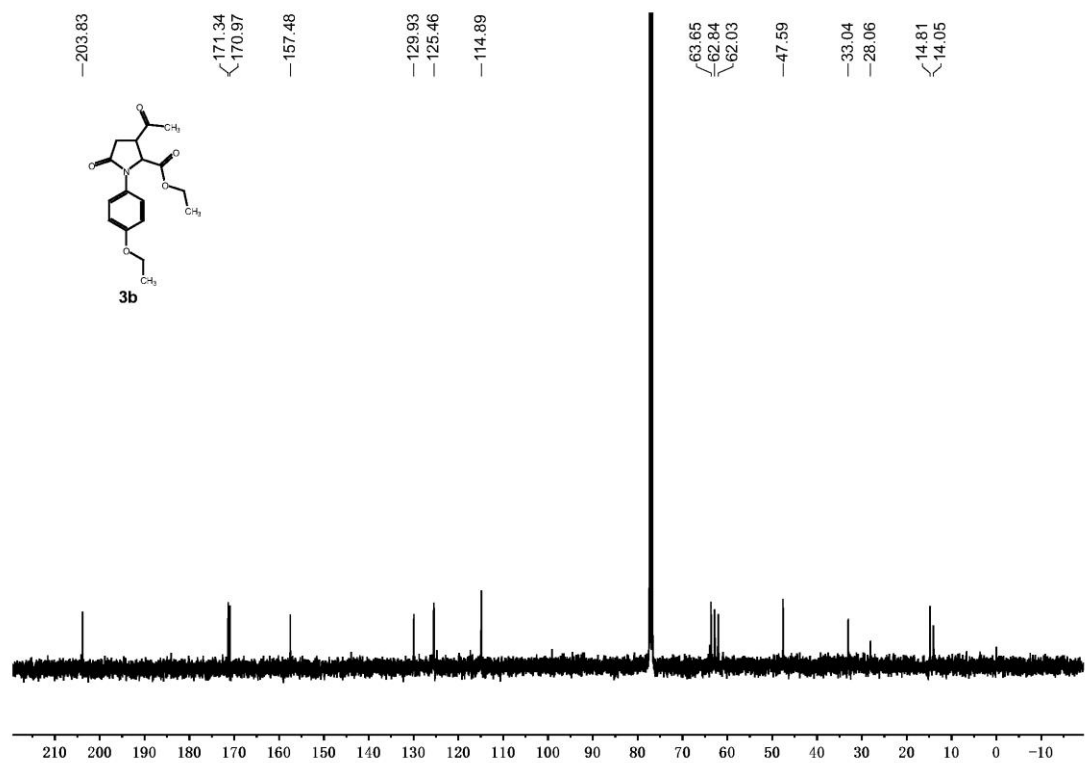



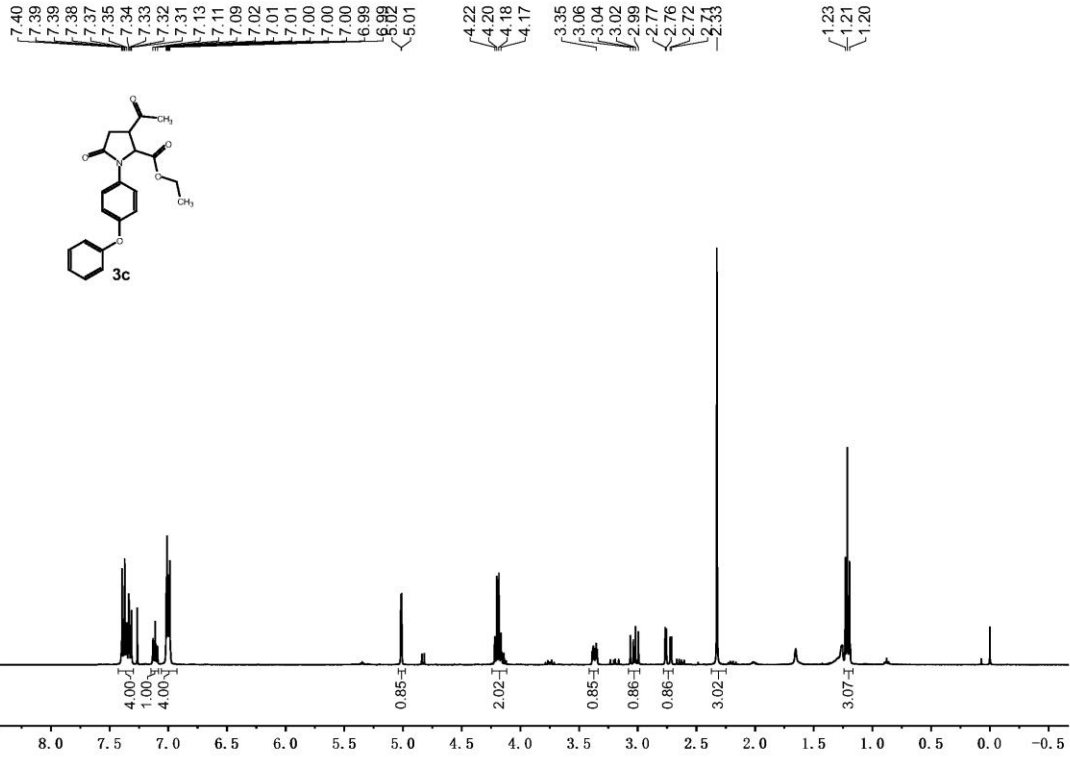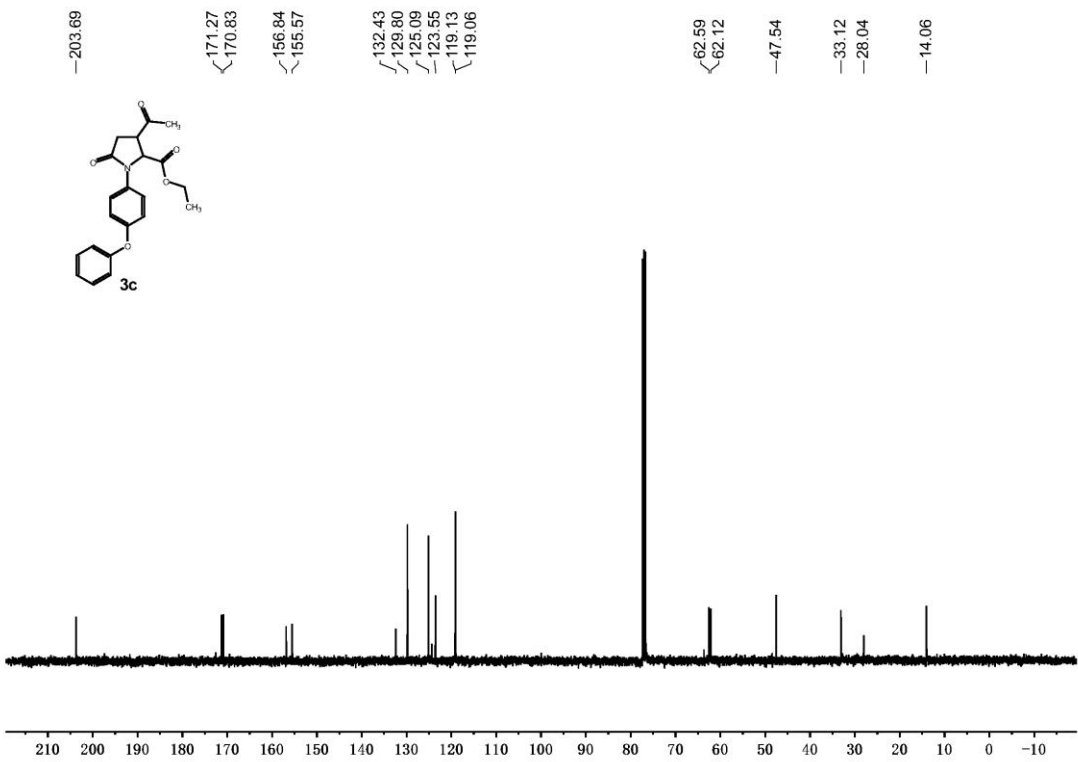

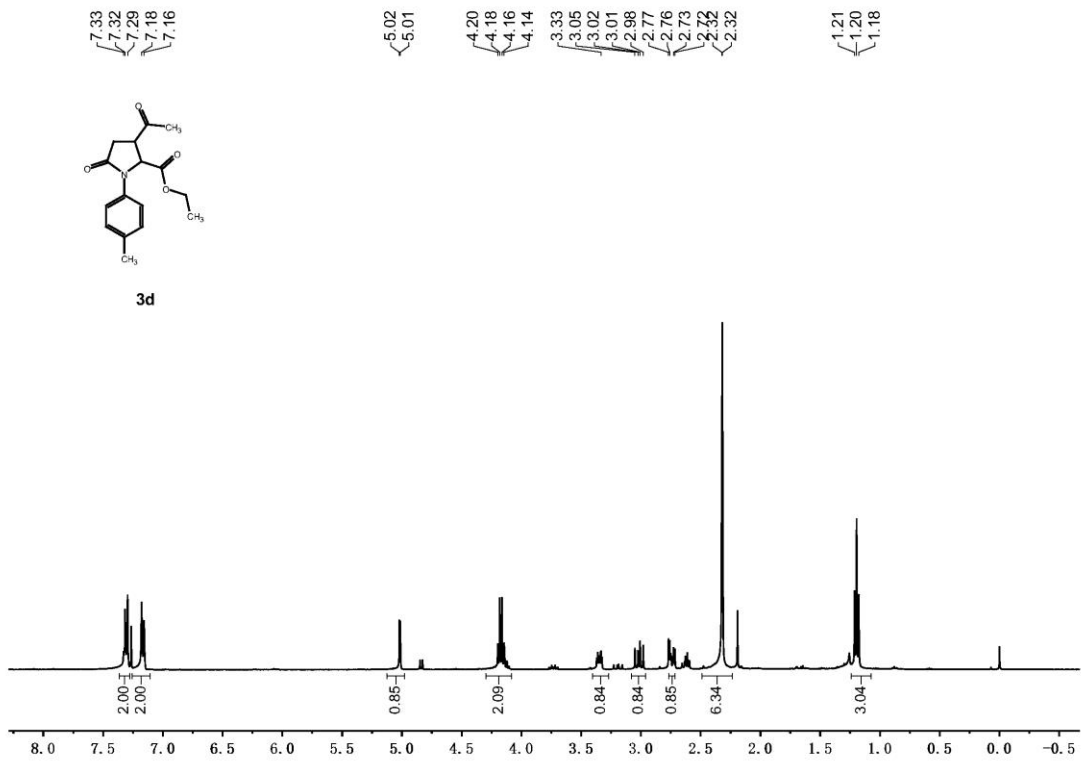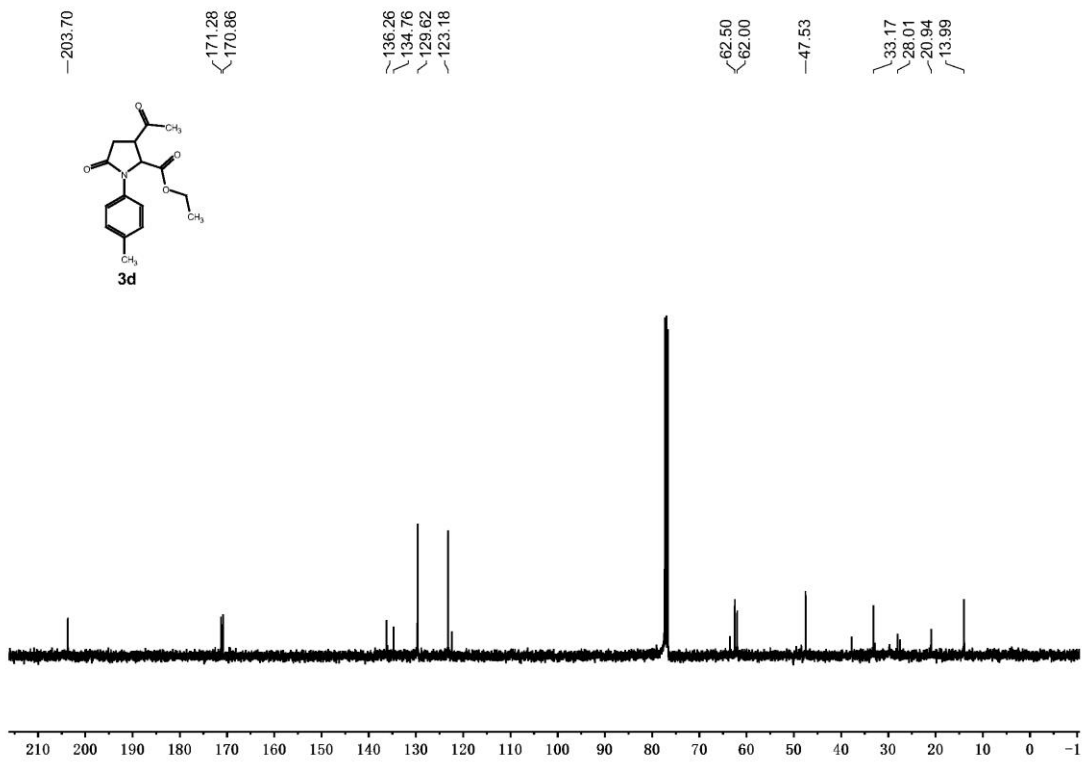

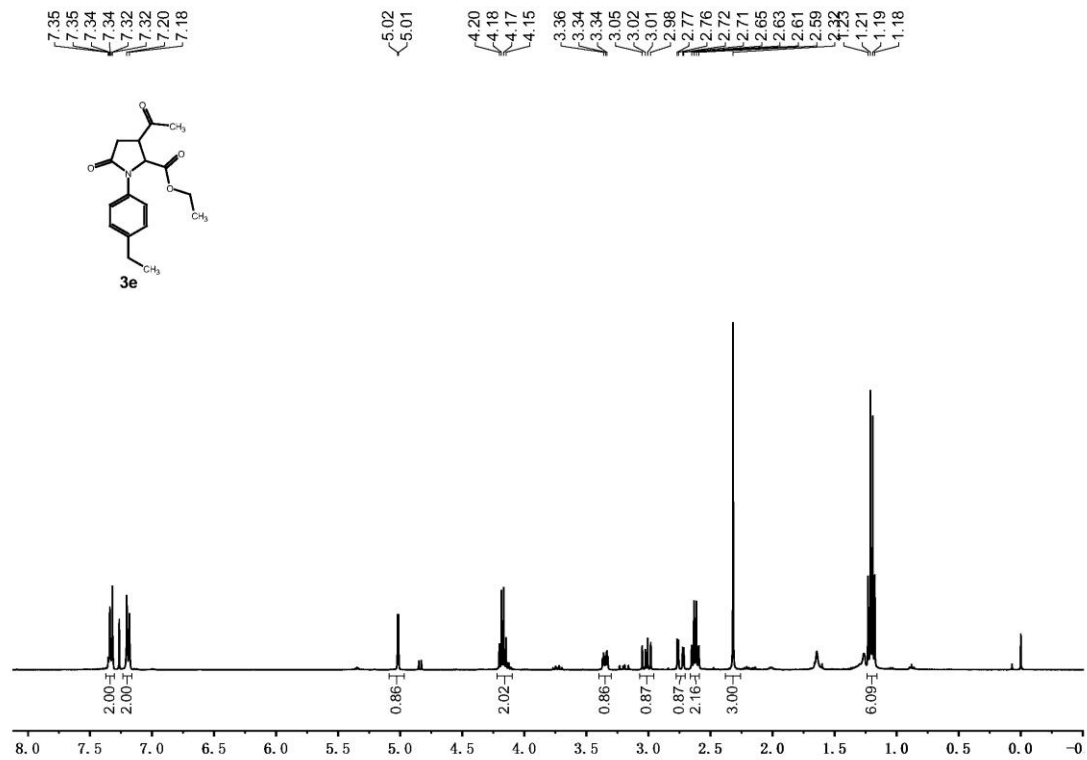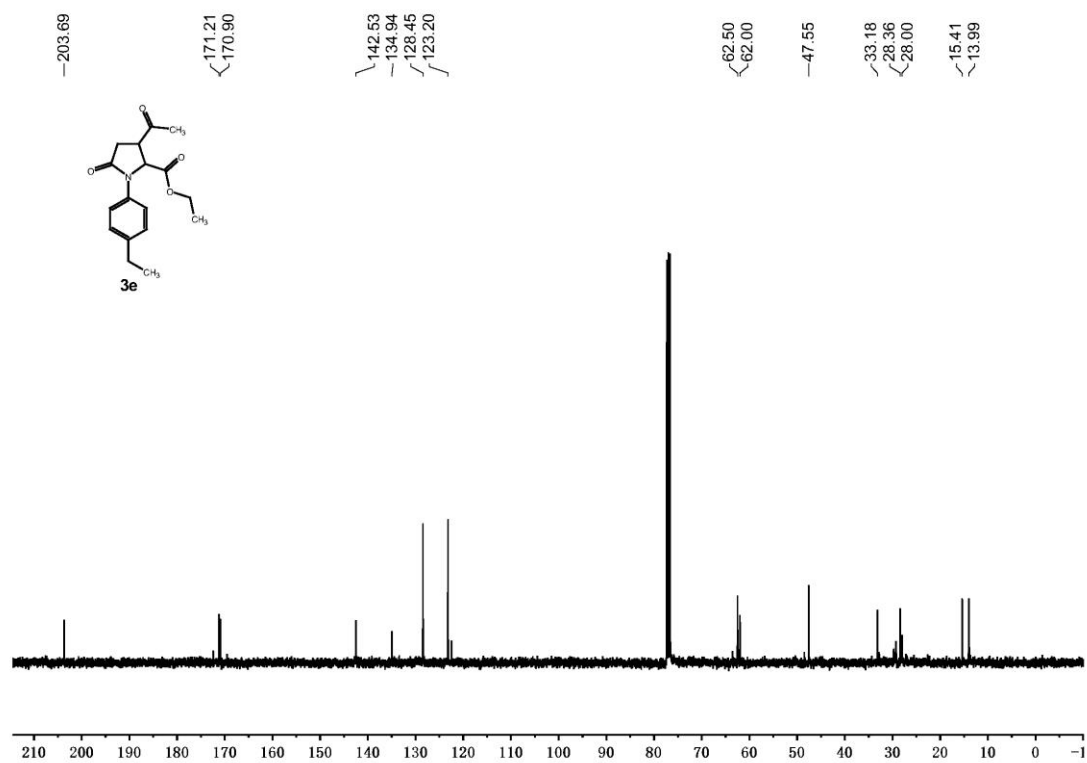

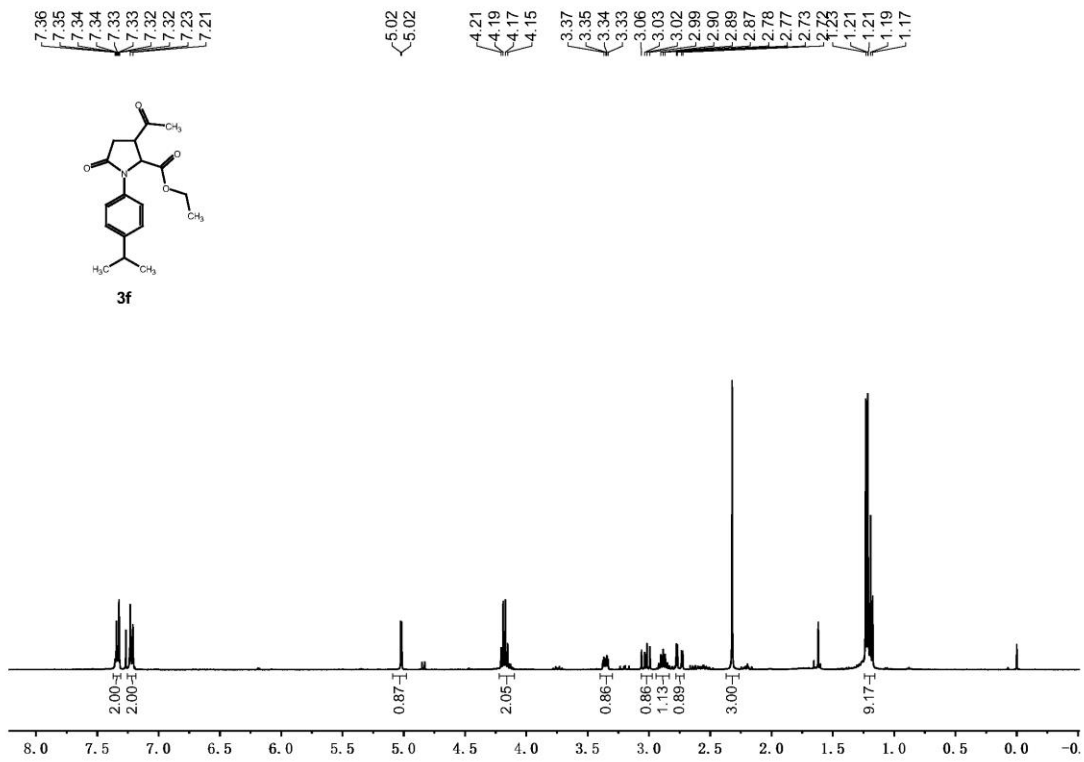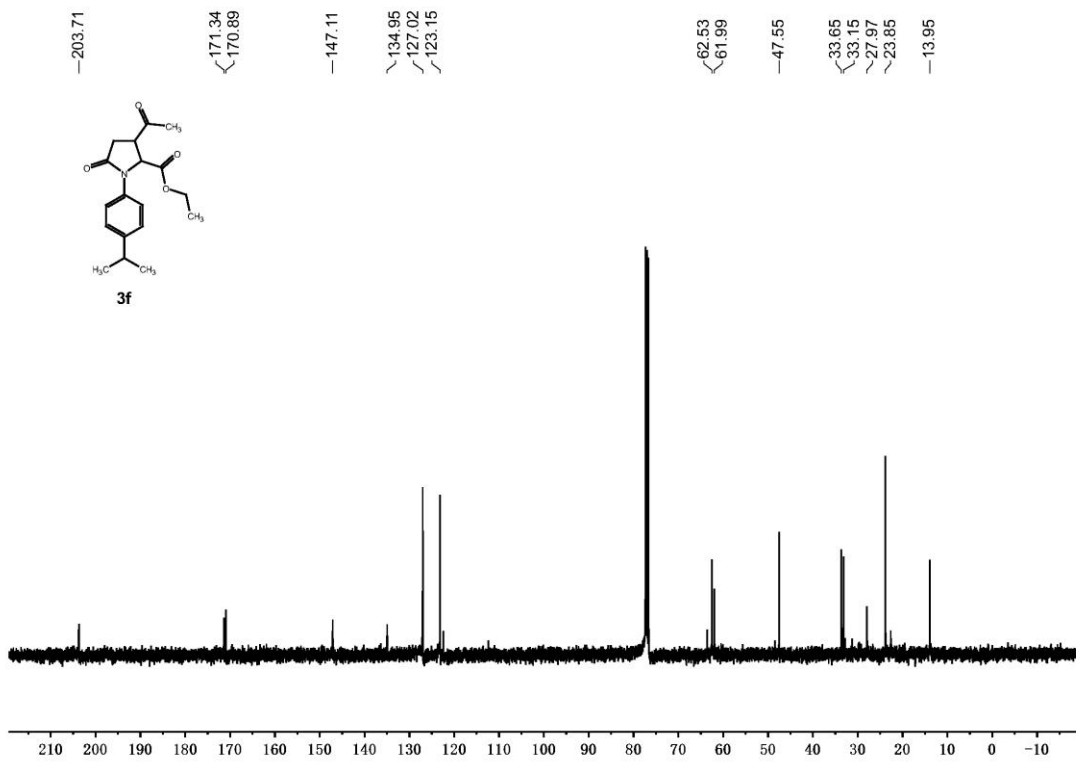

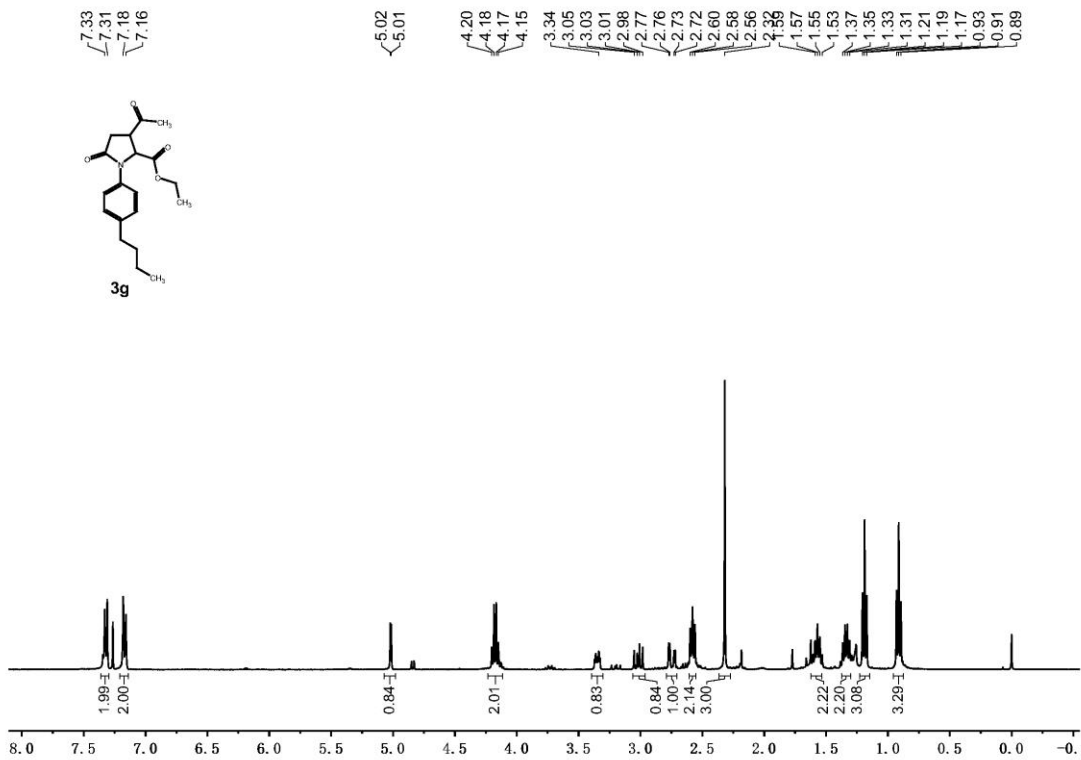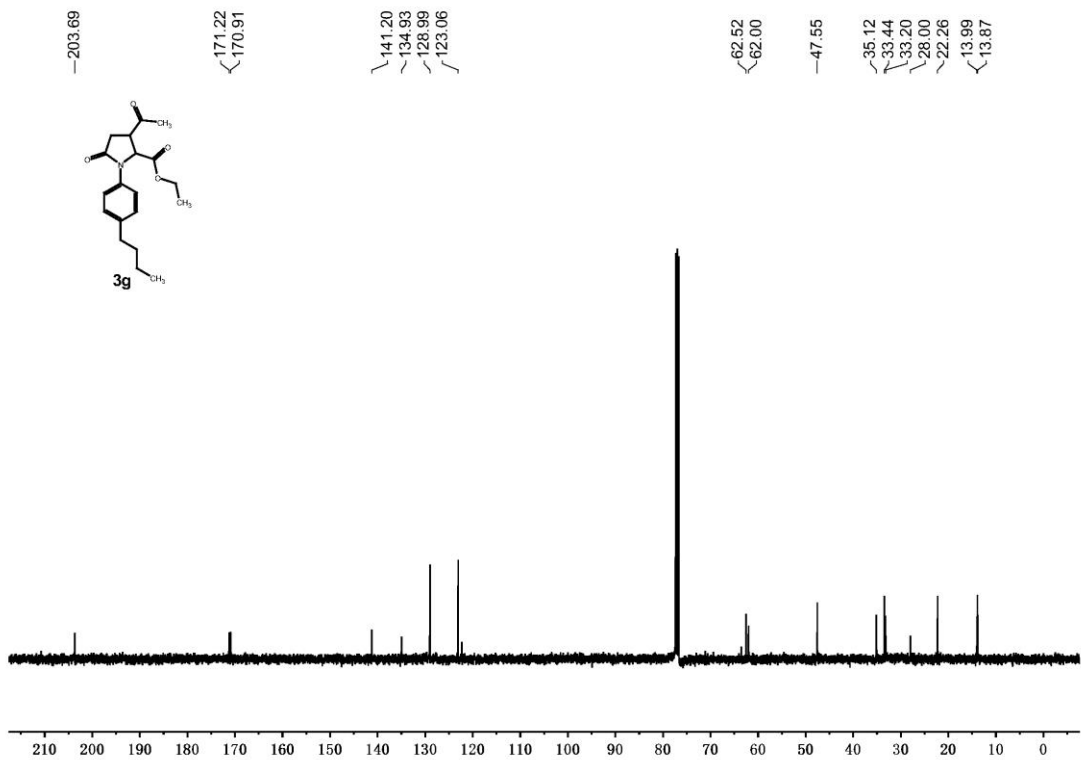

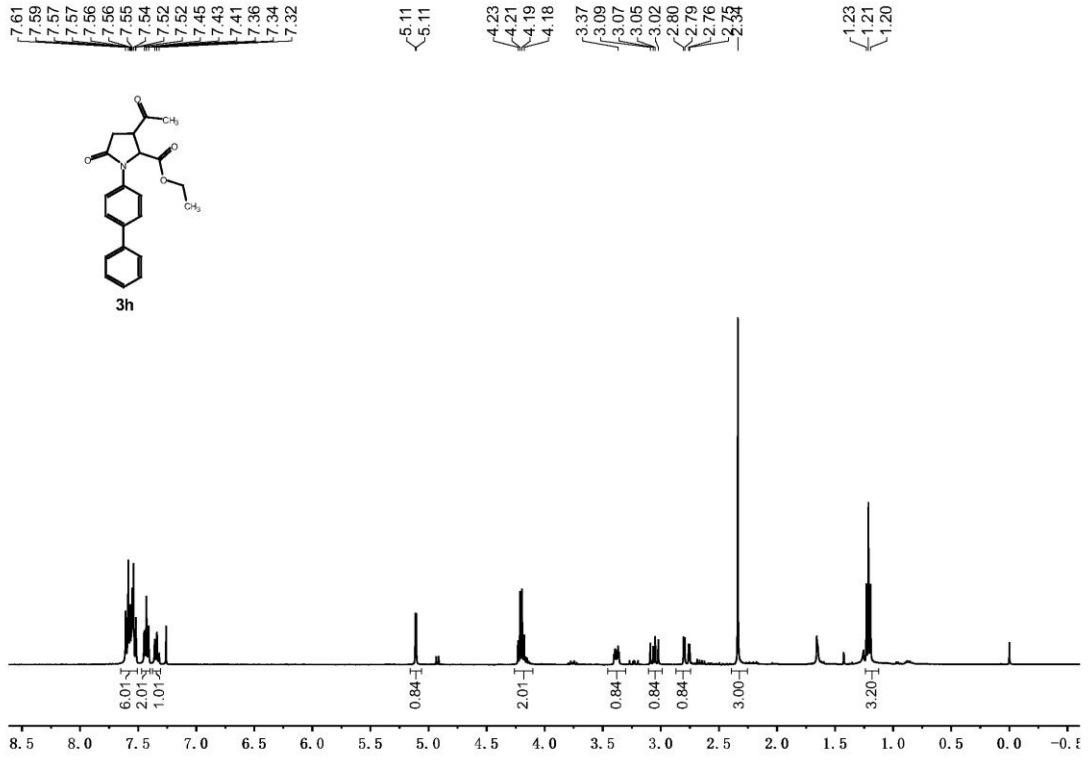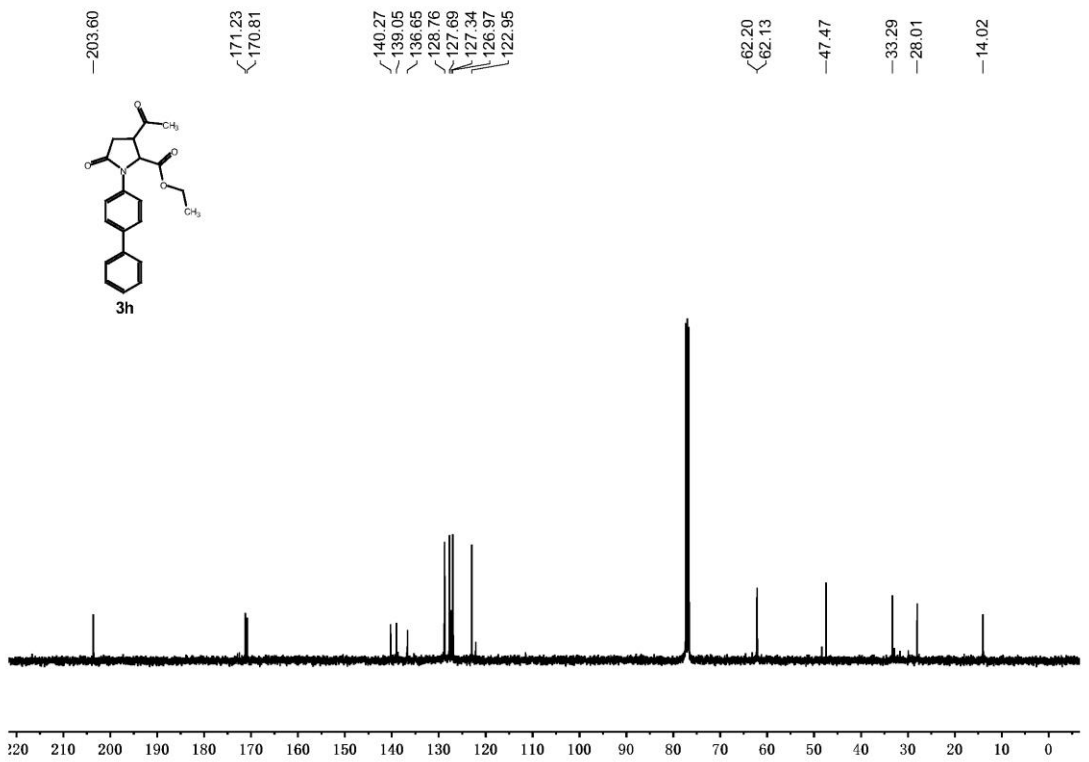

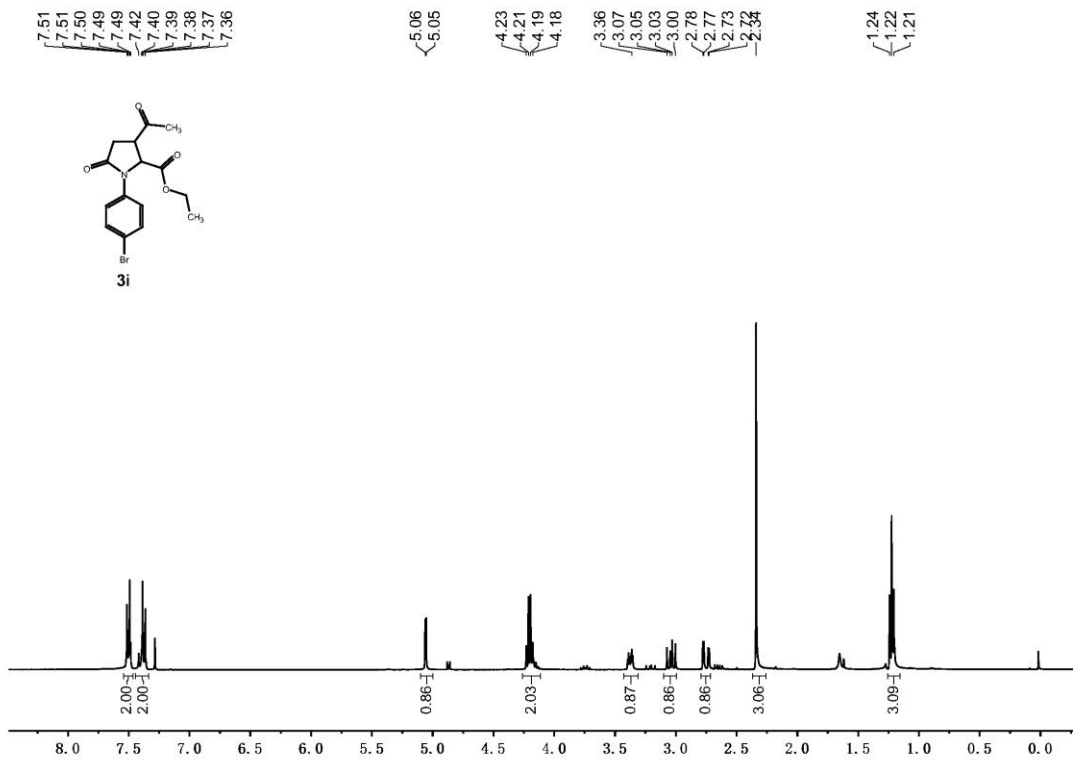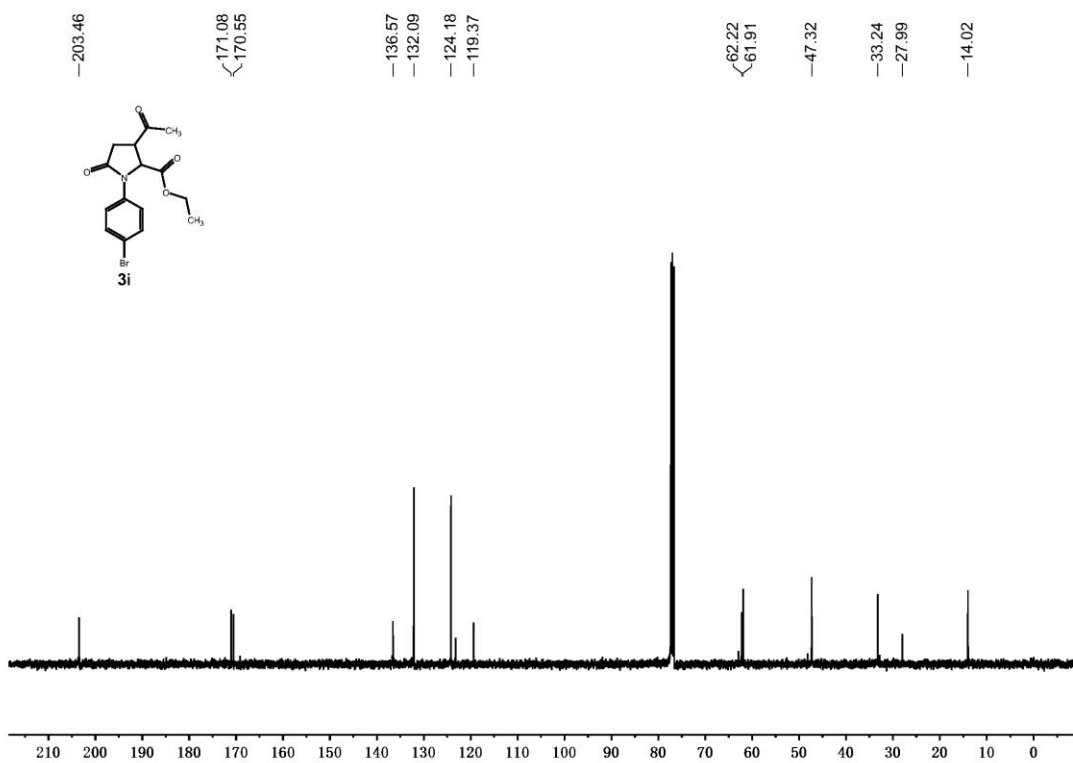

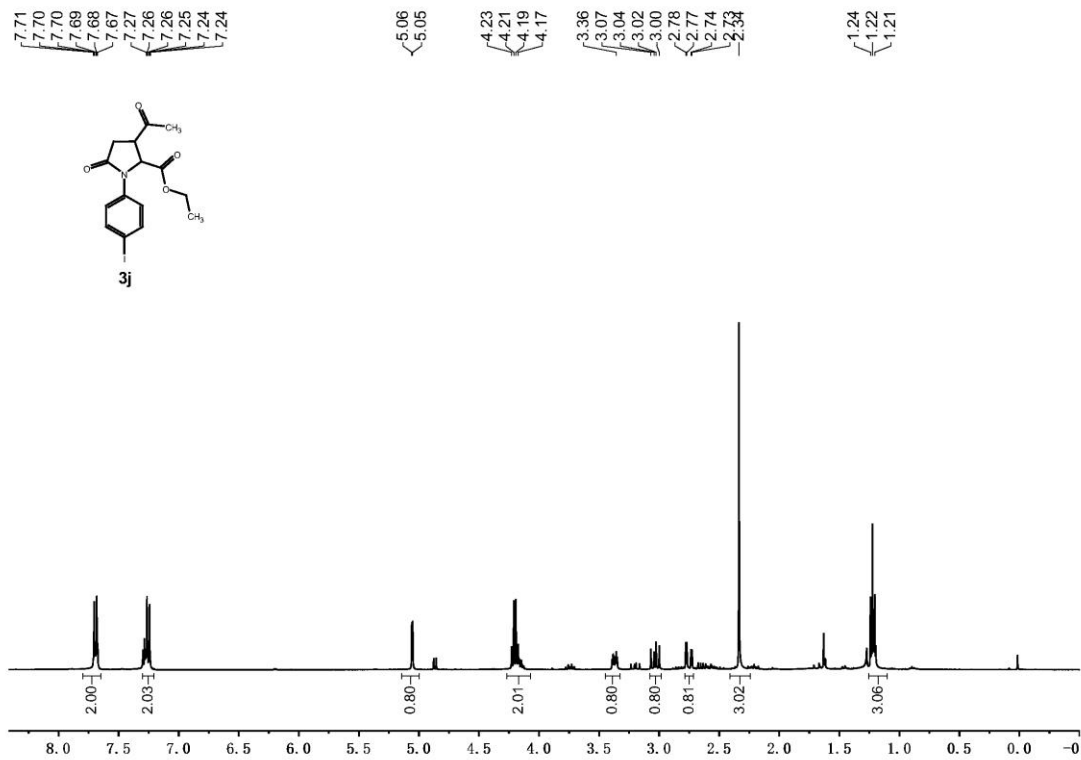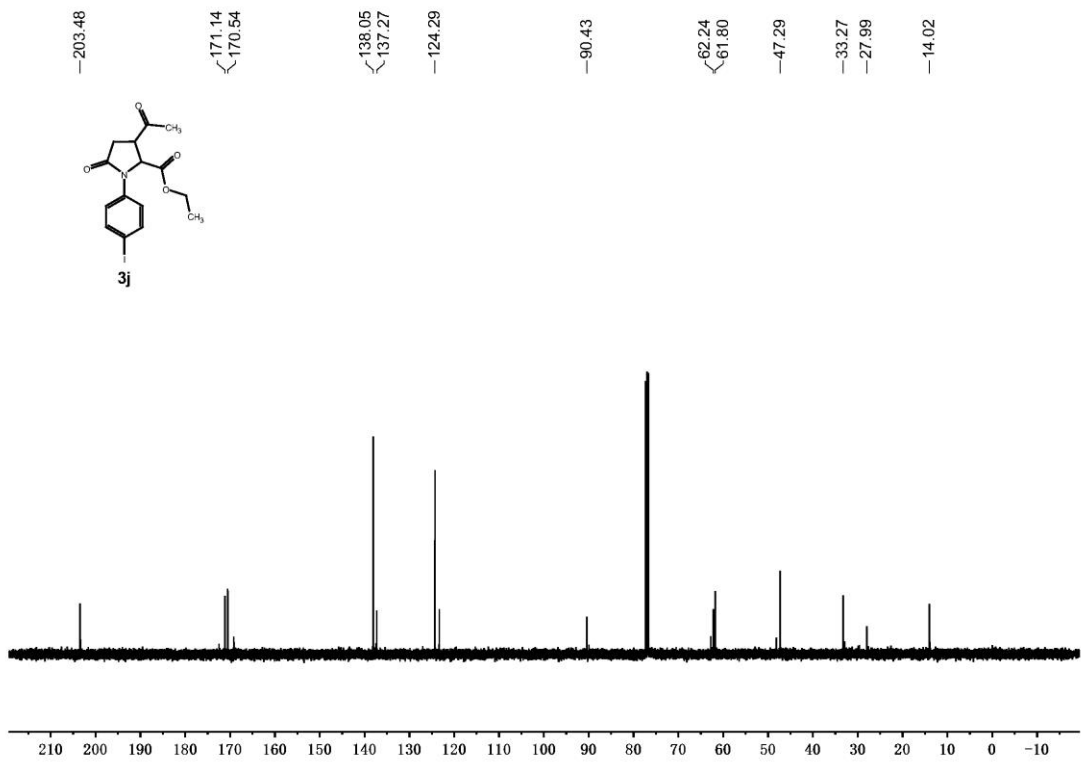



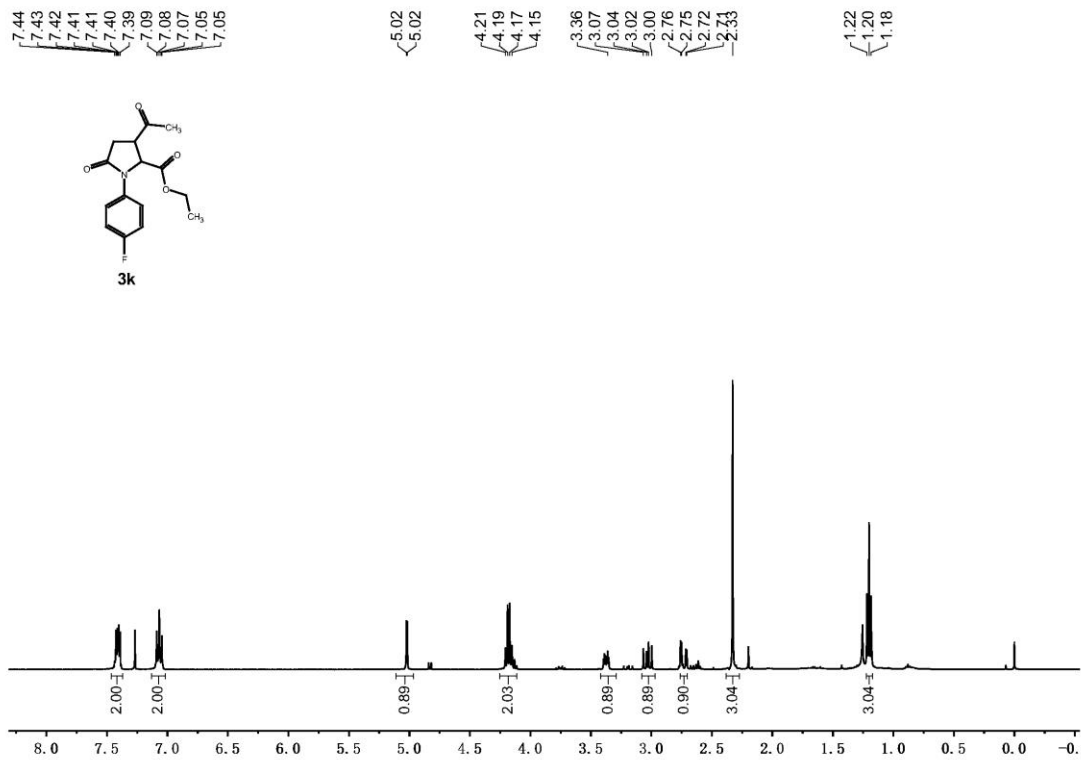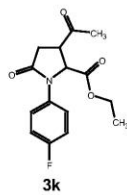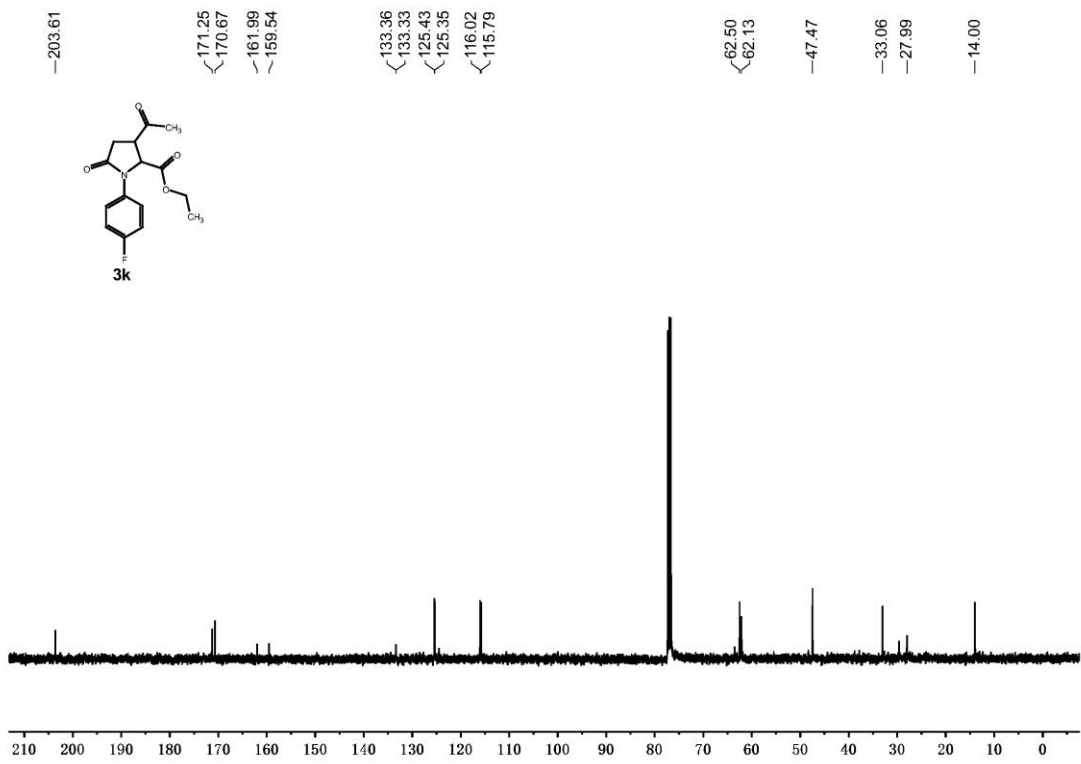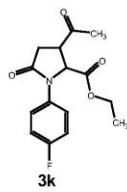

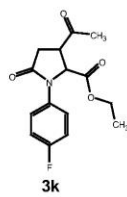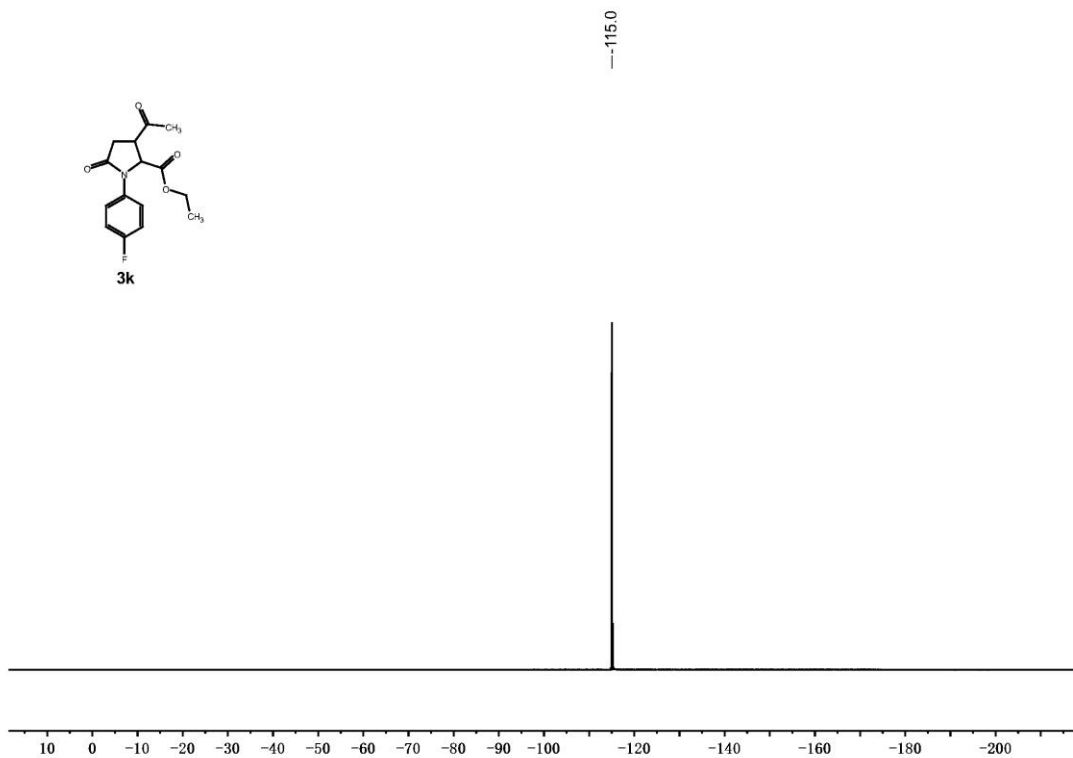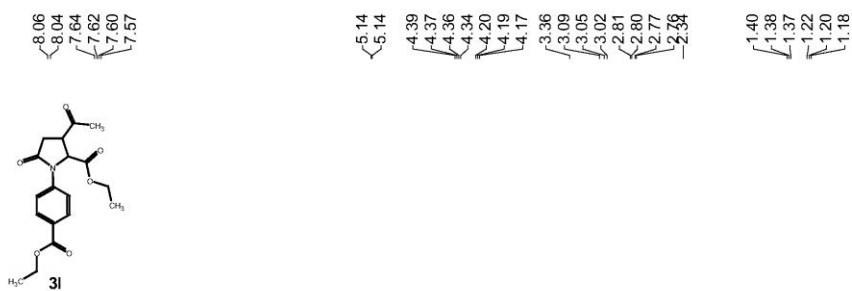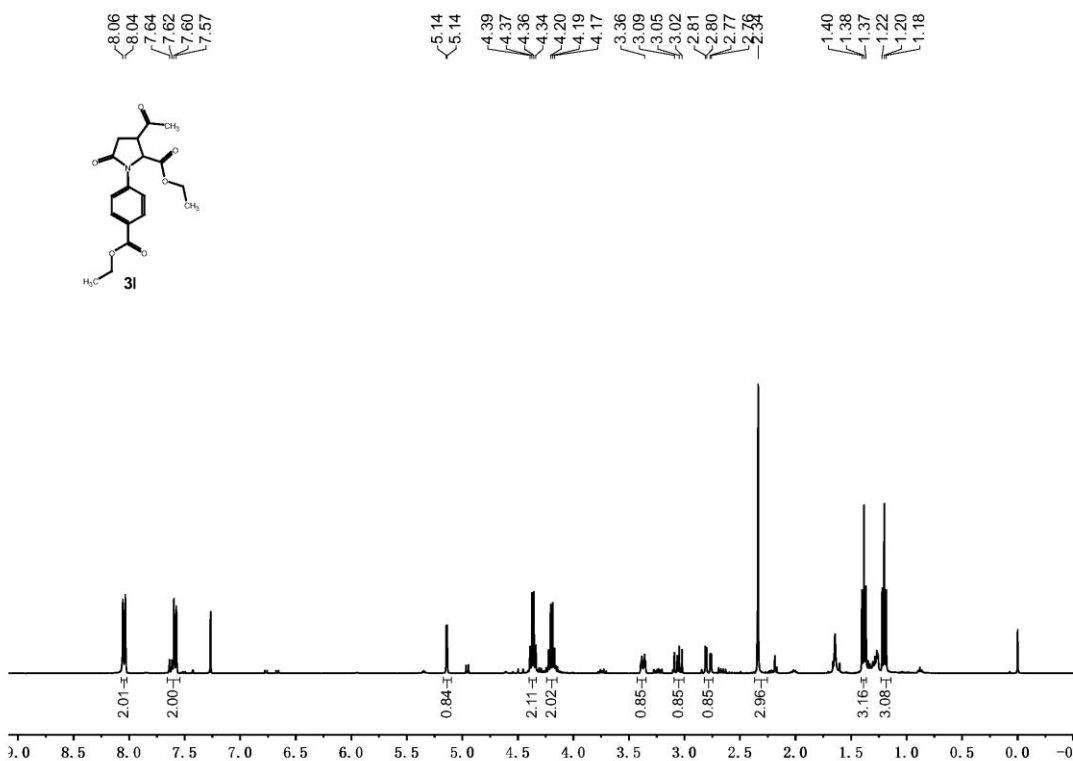

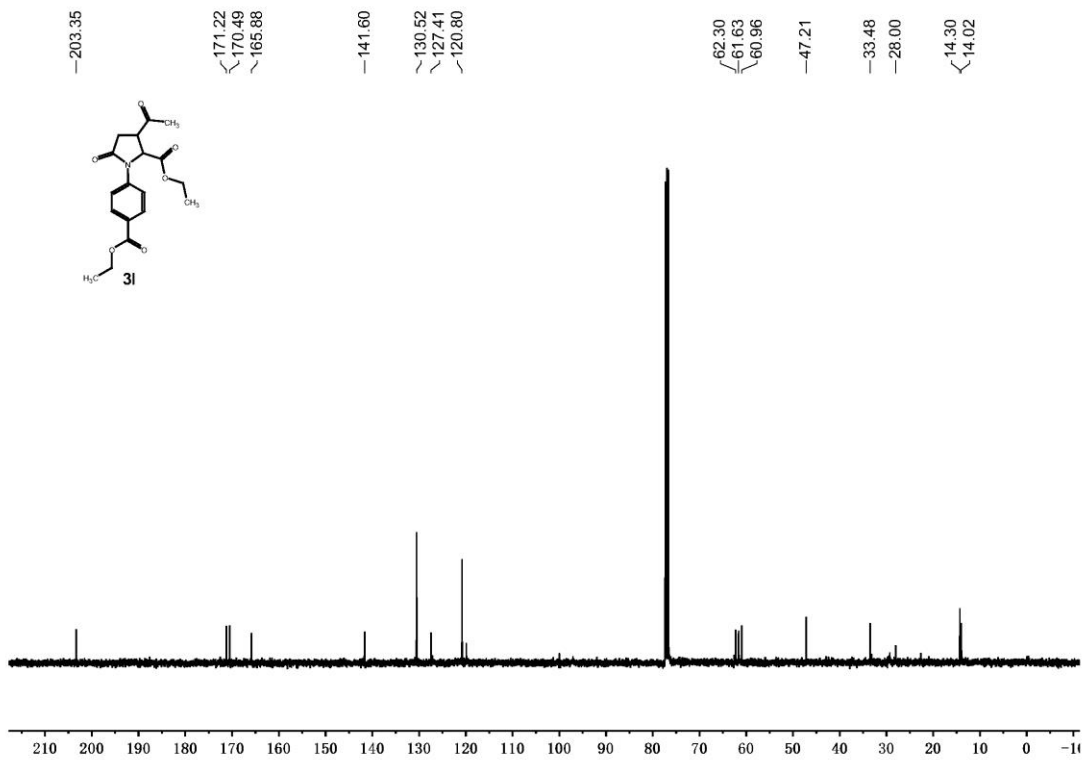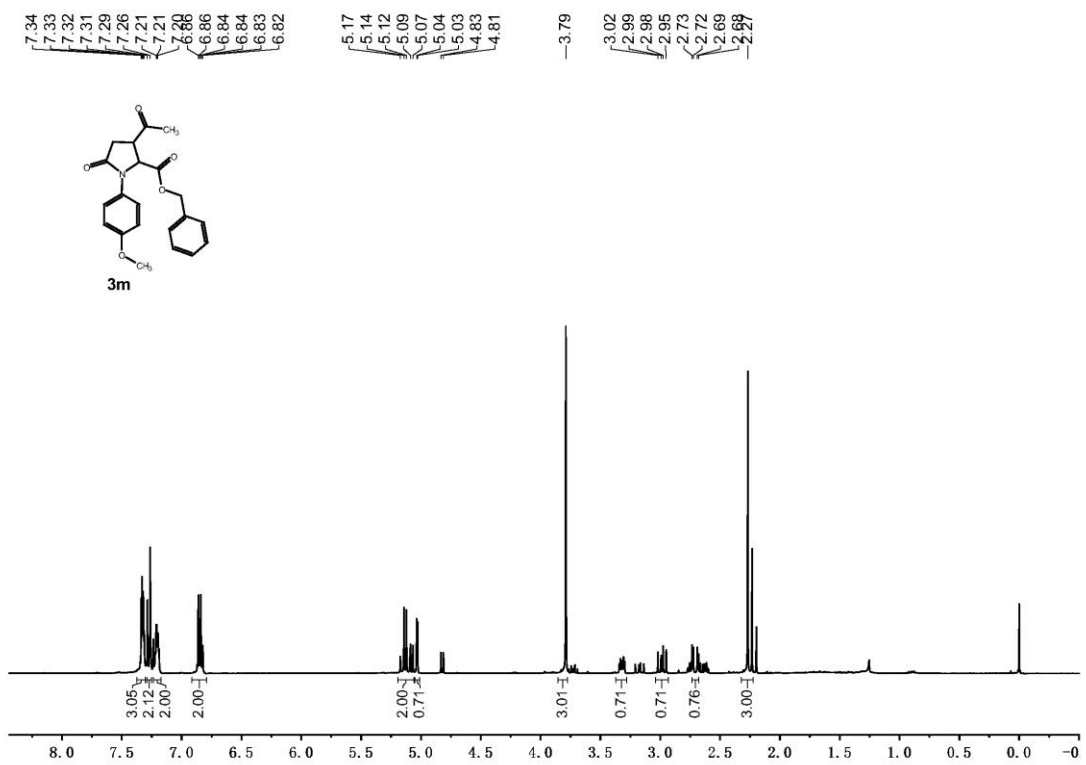

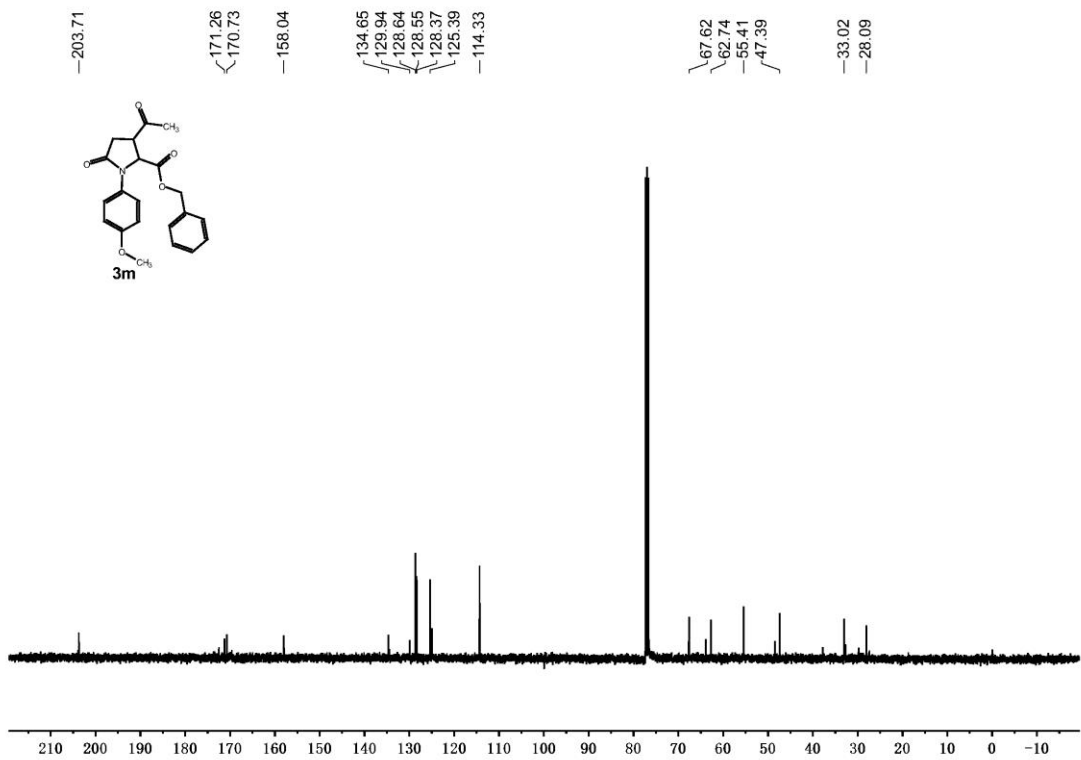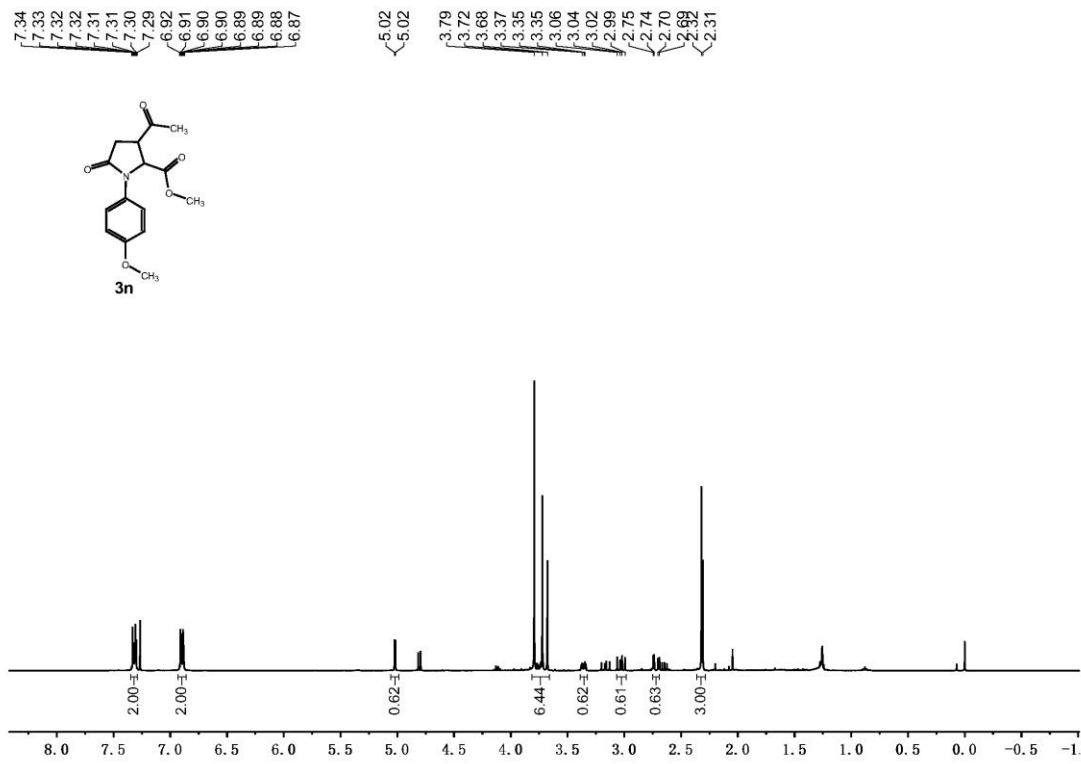

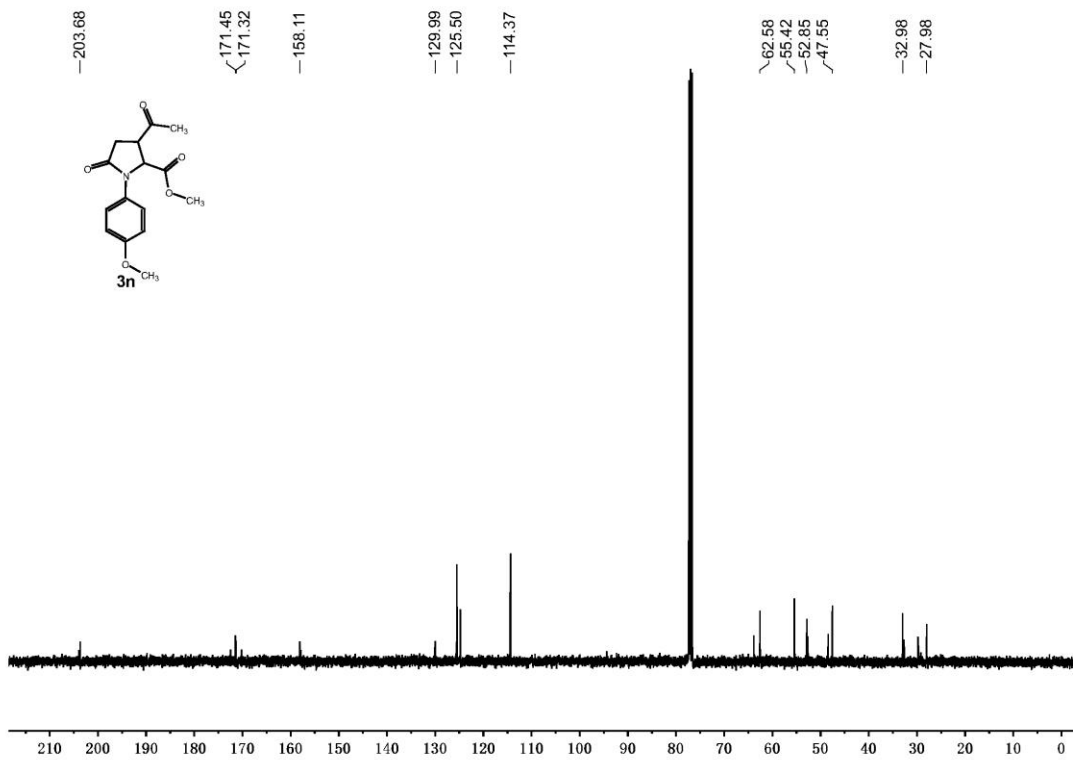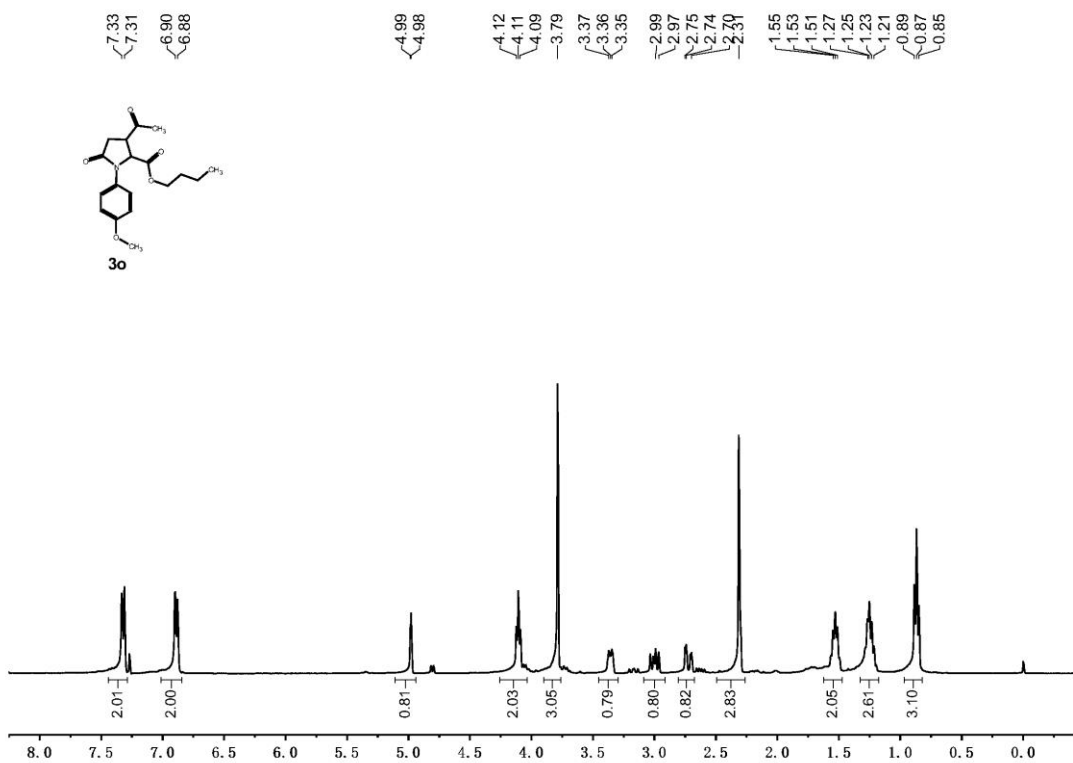

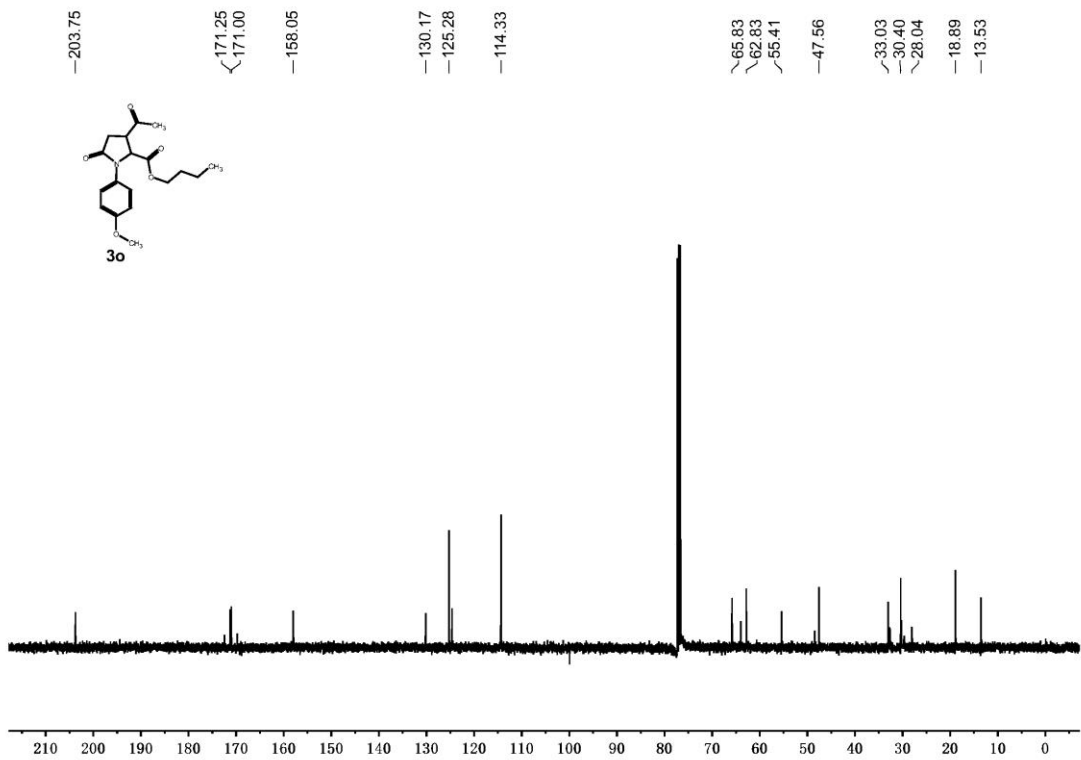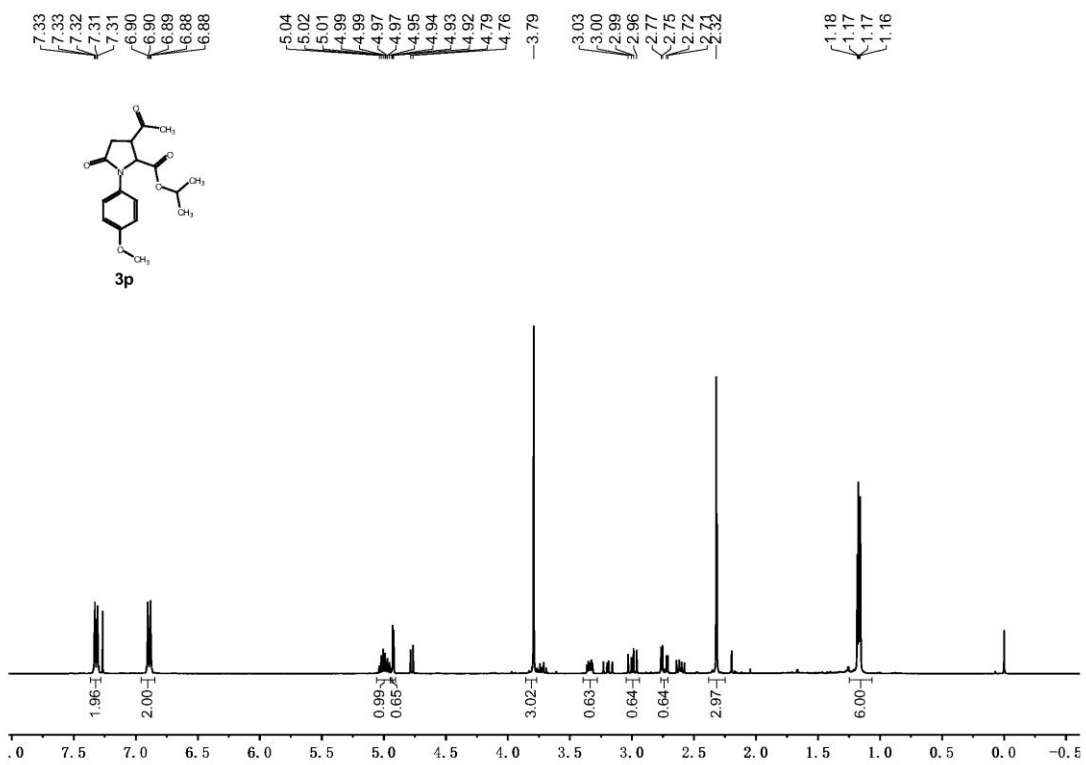

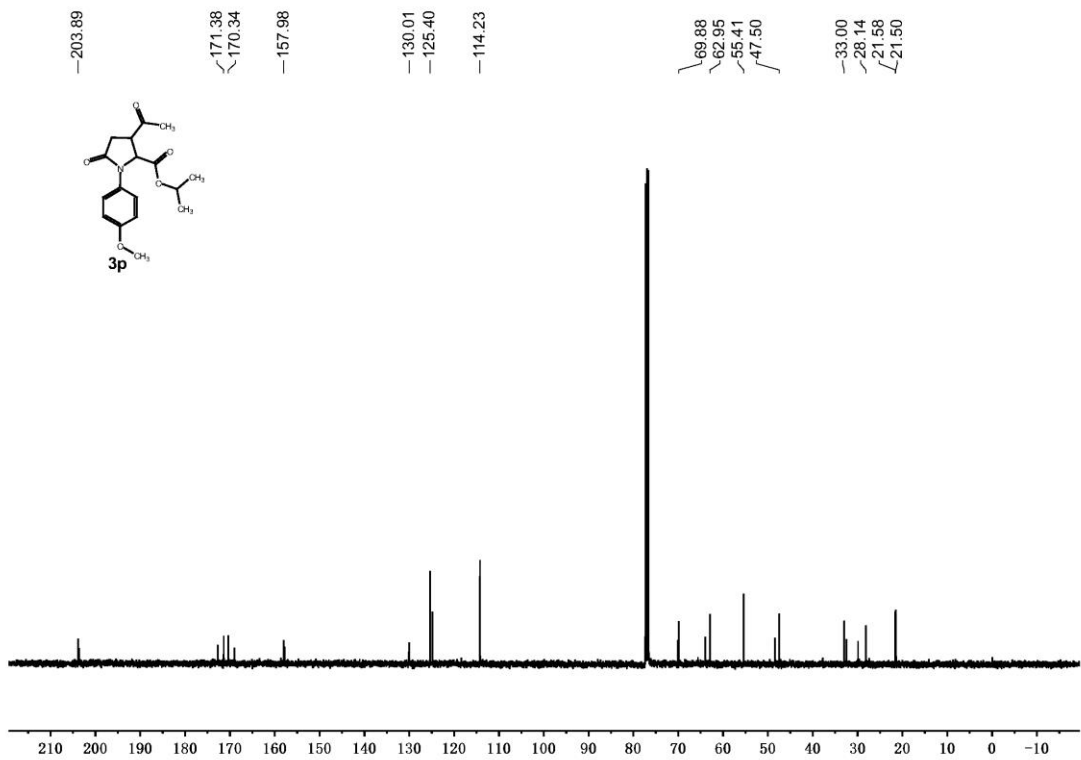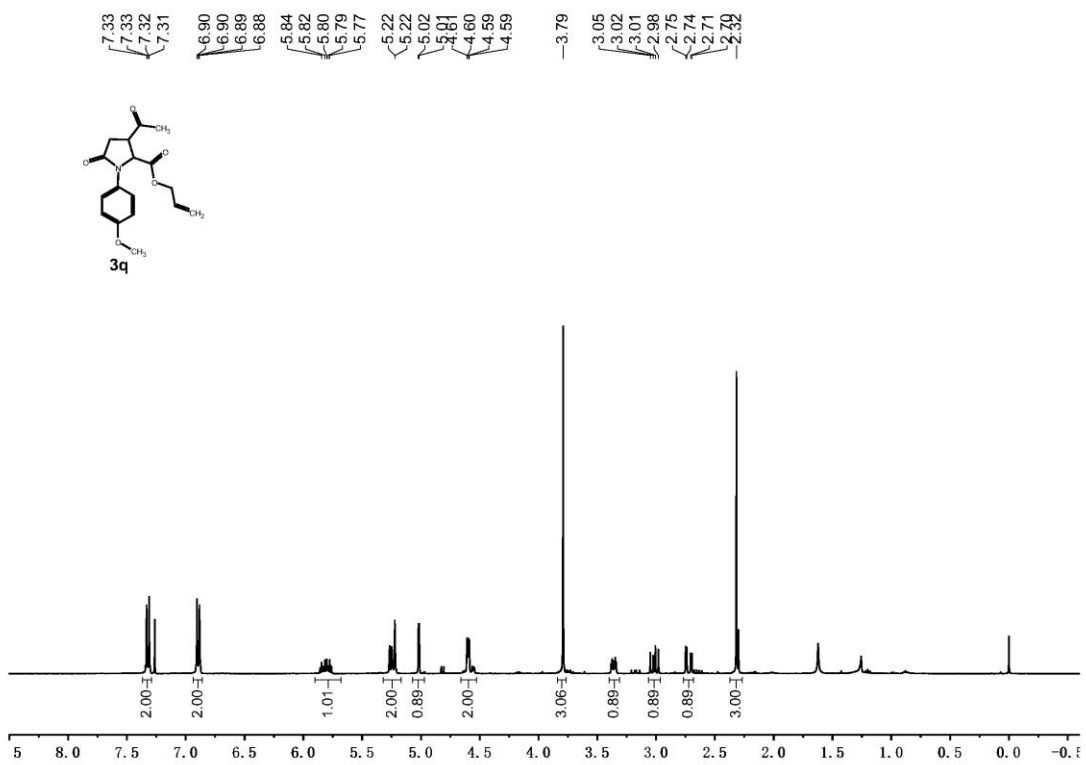

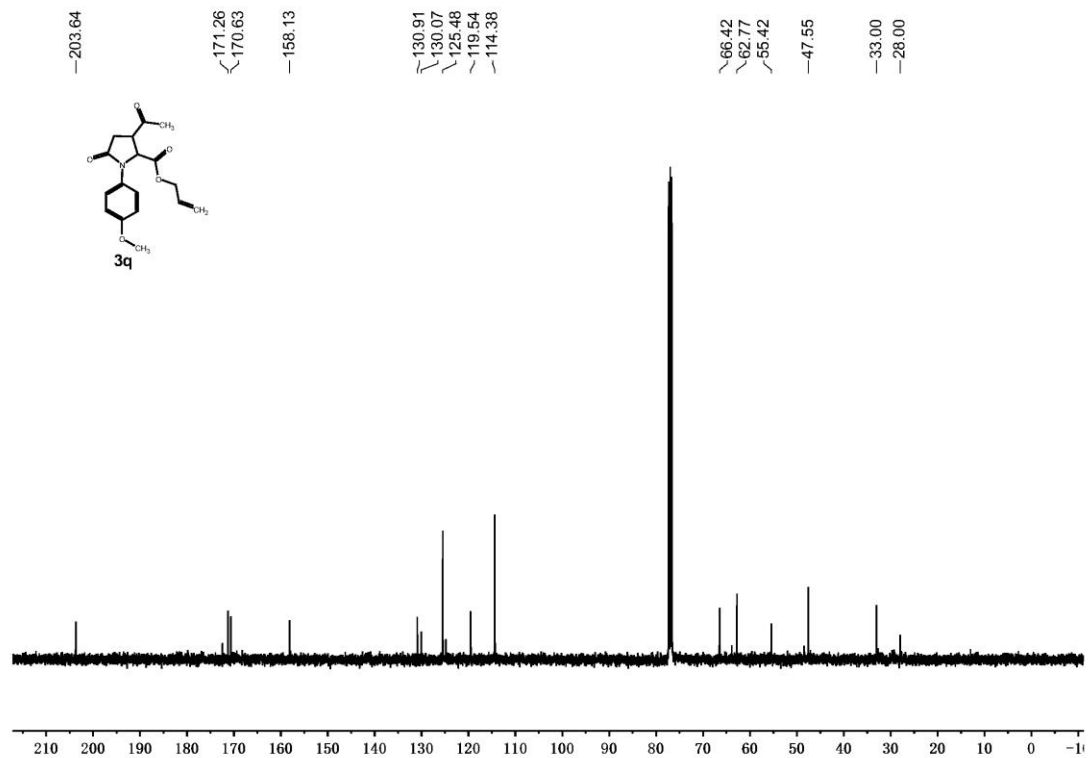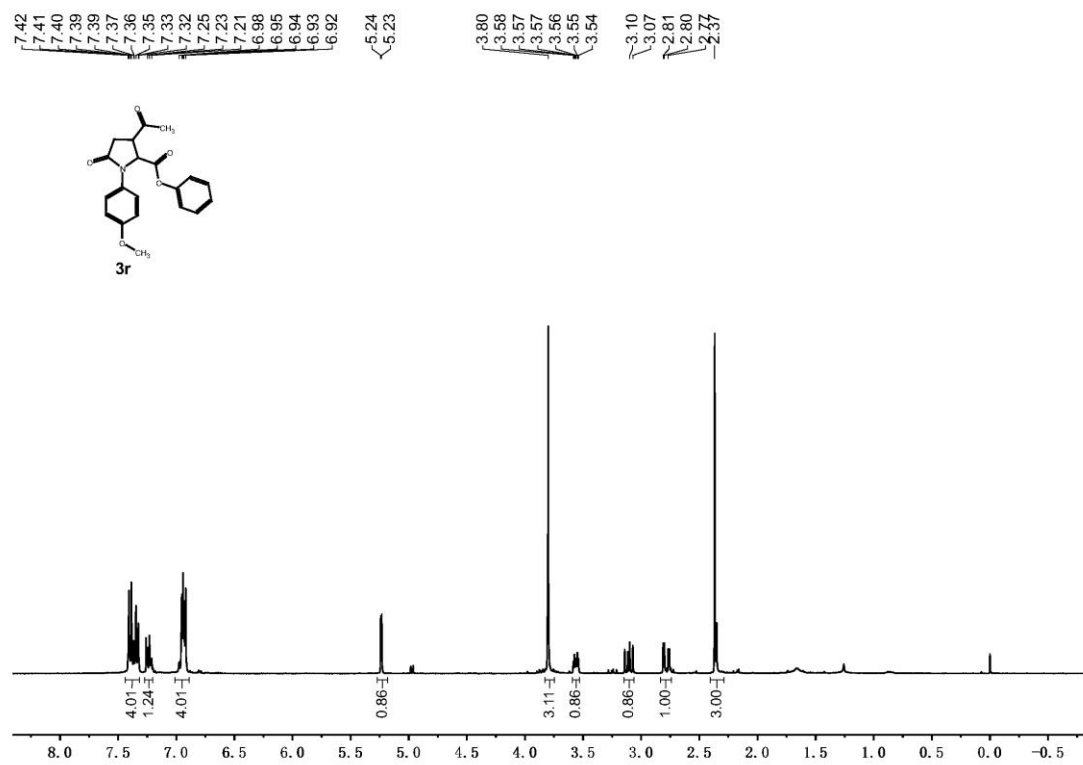



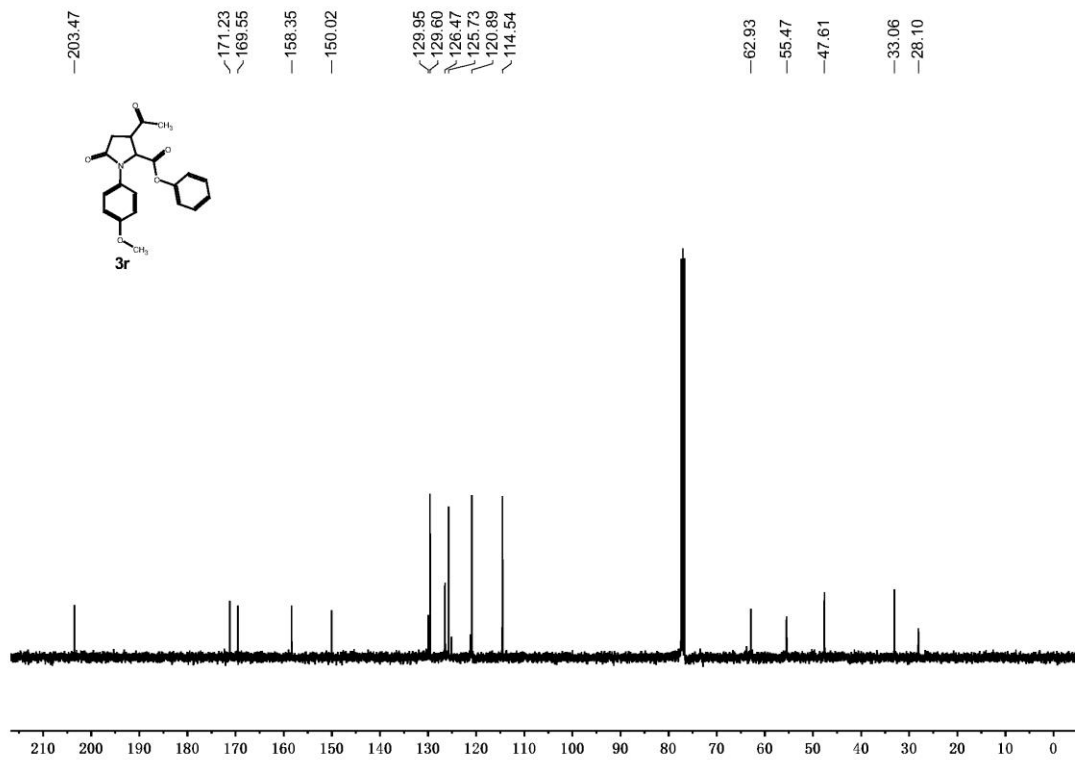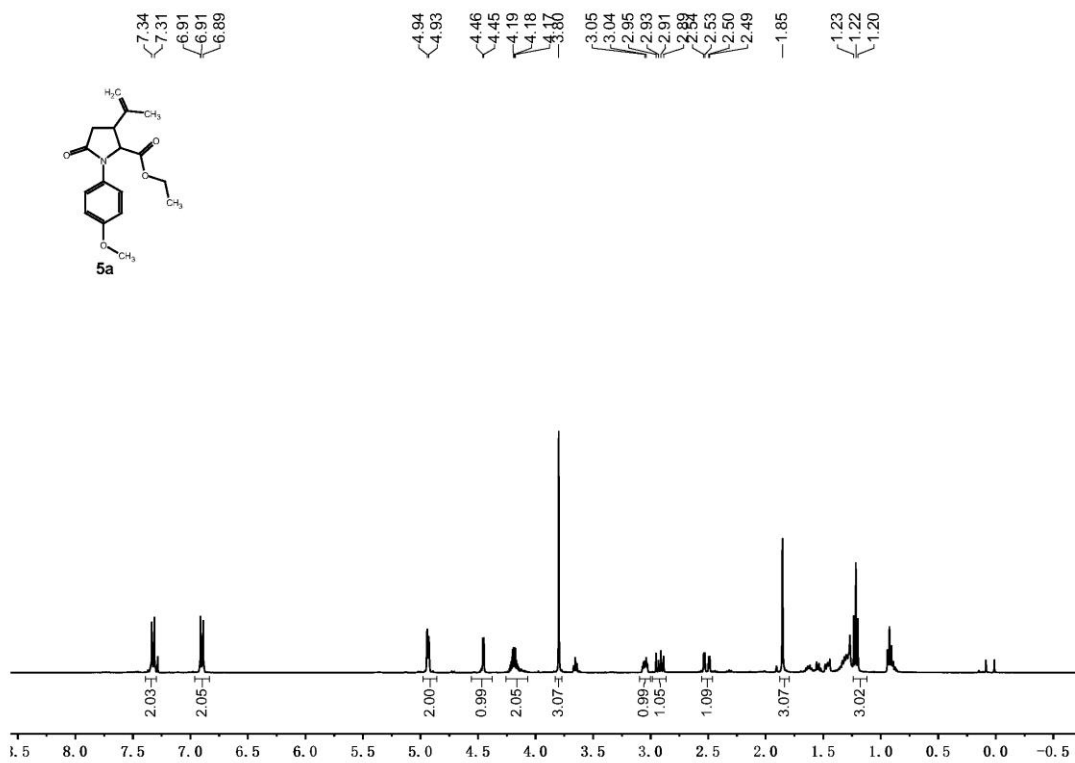

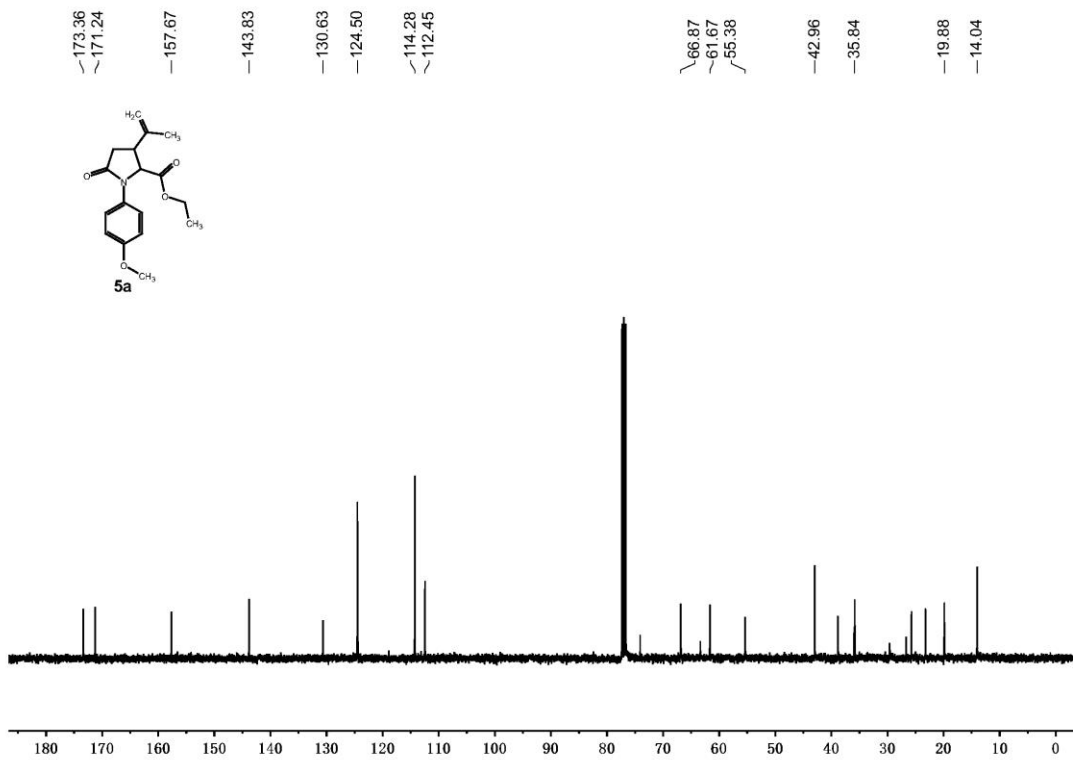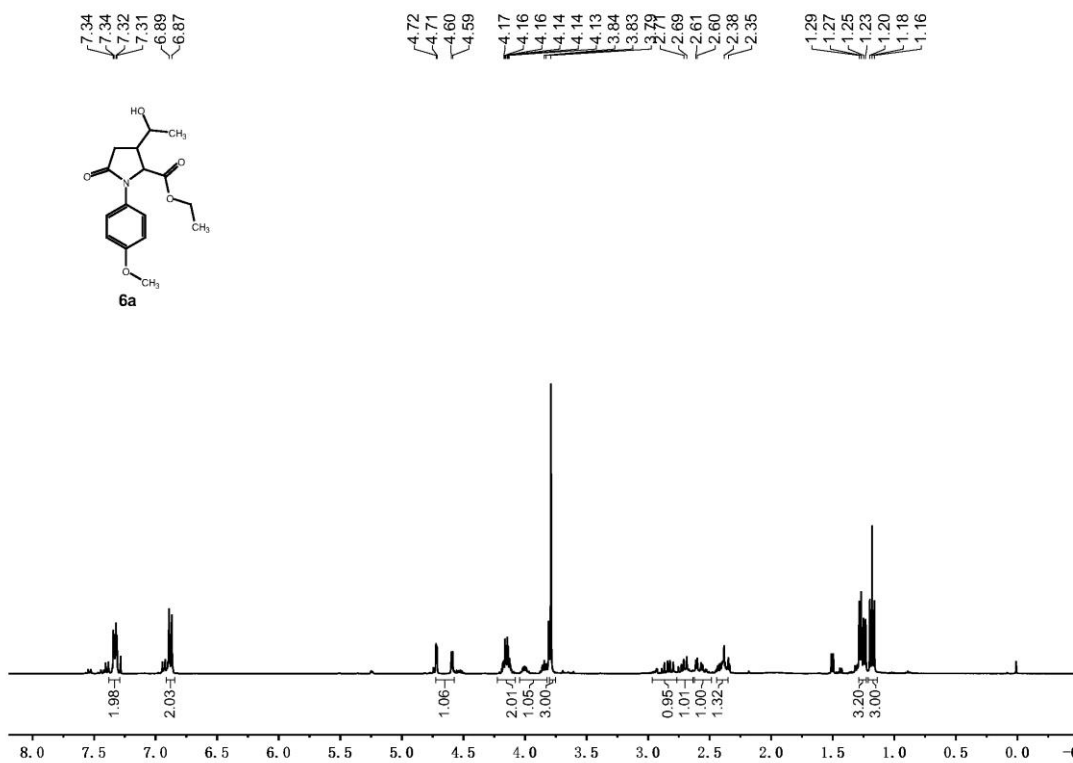

~173.6  
~171.9

—157.7

—130.6

—124.9

—114.2

~69.1

~64.3

~61.6

~55.4

—43.2

—34.3

—21.1

—14.0

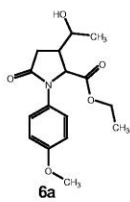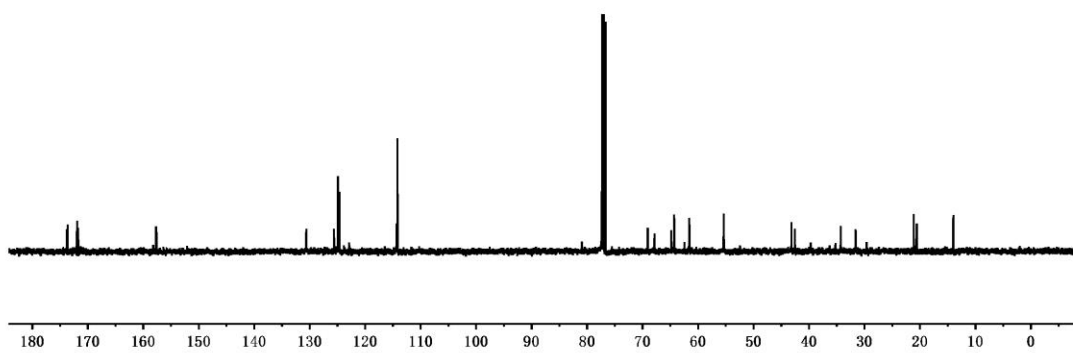

Supplement: c8ob01844h1.pdf [file c8ob01844h1.pdf]
